# Supplementary material for: The cyanobacterial circadian clock follows midday in vivo and in vitro
Source: eLife. 2017 Jul 7;6:e23539. doi: 10.7554/eLife.23539 (PMC5605227; doi:10.7554/eLife.23539)
Supplement: Figure 1—source data 1. — DOI: http://dx.doi.org/10.7554/eLife.23539.004 [file elife-23539-fig1-data1.xlsx]

## Sheet: LD8-16
daylength8_time_hrs	biolum_norm_arb
2.5	0.0572306
3	0.0374694
3.5	0.0207878
4	0.0123187
4.5	0.00641598
5	0
5.5	0.00564607
6	0.0123187
6.5	0.0243807
7	0.046965
7.5	0.0698059
26.5	0.0136019
27	0.00461951
27.5	0
28	0.00102656
28.5	0.00487615
29	0.0207878
29.5	0.0456818
30	0.0757086
30.5	0.101629
31	0.142691
31.5	0.183497
50.5	0.0374694
51	0.0200179
51.5	0.00410623
52	0
52.5	0.00949566
53	0.0254073
53.5	0.0605669
54	0.110098
54.5	0.144745
55	0.22225
55.5	0.282303
74.5	0.0577439
75	0.0161683
75.5	0
76	0.00205312
76.5	0.0146284
77	0.0510712
77.5	0.107019
78	0.168612
78.5	0.243551
79	0.34749
79.5	0.460411
98.5	0.0805848
99	0.028487
99.5	0
100	0.00333631
100.5	0.0325932
101	0.111381
101.5	0.194533
102	0.311304
102.5	0.436287
103	0.610032
103.5	0.796865
122.5	0.18555
123	0.101629
123.5	0.075452
124	0.118311
124.5	0.187603
125	0.306684
125.5	0.449376
126	0.589757
126.5	0.792246
127	0.969327
127.5	1.19414
128	1.42076
128.5	1.7046
129	1.92377
129.5	2.17784
130	2.40959
130.5	2.63415
131	2.86333
131.5	3.03322
132	3.15256
132.5	3.20613
133	3.23083
133.5	3.17501
134	2.99569
134.5	2.79249
135	2.50634
135.5	2.15218
136	1.75618
136.5	1.38714
137	1.07866
137.5	0.857176
138	0.680864
138.5	0.545872
139	0.440137
139.5	0.351339
140	0.297702
140.5	0.223276
141	0.188887
141.5	0.153214
142	0.106762
142.5	0.0685227
143	0.0633899
143.5	0.0228409
144	0.0356729
144.5	0.00205312
145	0
145.5	0.00487615
146	0.0390092
146.5	0.0672395
147	0.139868
147.5	0.214294
148	0.317463
148.5	0.427561
149	0.582315
149.5	0.729626
150	0.90953
150.5	1.08969
151	1.25805
151.5	1.43205
152	1.61811
152.5	1.8188
153	1.98536
153.5	2.15012
154	2.32515
154.5	2.47657
155	2.6131
155.5	2.71011
156	2.79172
156.5	2.88129
157	2.93506
157.5	2.89156
158	2.81482
158.5	2.65724
159	2.43422
159.5	2.17066
160	1.90683
160.5	1.59681
161	1.28114
161.5	1.02014
162	0.824069
162.5	0.650068
163	0.539969
163.5	0.441933
164	0.356215
164.5	0.279994
165	0.229436
165.5	0.183241
166	0.126267
166.5	0.111381
167	0.0698059
167.5	0.0446553
168	0.0510712
168.5	0.0251507
169	0.0241241
169.5	0.0503013
170	0.0716024
170.5	0.140382
171	0.204285
171.5	0.286153

## Sheet: LD12-12
daylength12_time_hrs	biolum_norm_arb
2.5	0.0182651
3	0.00913254
3.5	0
4	0.00424011
4.5	0.00587092
5	0.00880638
5.5	0.0182651
6	0.0388133
6.5	0.0567522
7	0.0815405
7.5	0.108938
8	0.135357
8.5	0.168626
9	0.194719
9.5	0.23712
10	0.274629
10.5	0.313442
11	0.369542
11.5	0.401179
26.5	0.0694725
27	0.0469673
27.5	0.0270715
28	0.0182651
28.5	0.00978486
29	0.00489243
29.5	0
30	0.00913254
30.5	0.0228313
31	0.0352255
31.5	0.0629493
32	0.0883899
32.5	0.125572
33	0.143511
33.5	0.190479
34	0.254406
34.5	0.304962
35	0.362366
35.5	0.432165
50.5	0.125572
51	0.0968702
51.5	0.0626231
52	0.0404441
52.5	0.0228313
53	0.0114157
53.5	0
54	0.000652324
54.5	0.014025
55	0.0332685
55.5	0.0613185
56	0.0981748
56.5	0.141228
57	0.220812
57.5	0.284413
58	0.372151
58.5	0.502616
59	0.612206
59.5	0.748542
74.5	0.29061
75	0.216898
75.5	0.14449
76	0.0962178
76.5	0.0414226
77	0.0179389
77.5	0.0026093
78	0
78.5	0.014025
79	0.0433796
79.5	0.0991533
80	0.183629
80.5	0.272998
81	0.415204
81.5	0.580242
82	0.762241
82.5	0.952067
83	1.22604
83.5	1.42305
98.5	0.421728
99	0.284413
99.5	0.201894
100	0.111874
100.5	0.048272
101	0.0231575
101.5	0
102	0.0215267
102.5	0.0714295
103	0.151992
103.5	0.298765
104	0.44195
104.5	0.625253
105	0.833997
105.5	1.11384
106	1.34835
106.5	1.5933
107	1.87413
107.5	2.09624
122.5	0.831387
123	0.671242
123.5	0.56002
124	0.50653
124.5	0.423358
125	0.378348
125.5	0.394004
126	0.427272
126.5	0.574045
127	0.665697
127.5	0.80138
128	0.946849
128.5	1.21365
129	1.34705
129.5	1.56427
130	1.69865
130.5	1.88163
131	2.15854
131.5	2.32293
132	2.50558
132.5	2.62006
133	2.88001
133.5	3.0669
134	3.12953
134.5	3.34251
135	3.2944
135.5	3.27605
136	3.17551
136.5	3.01309
137	2.86077
137.5	2.57766
138	2.31901
138.5	2.02547
139	1.74921
139.5	1.47523
140	1.27921
140.5	1.08025
141	0.935759
141.5	0.811491
142	0.67646
142.5	0.532297
143	0.455975
143.5	0.356169
144	0.315399
144.5	0.225052
145	0.159493
145.5	0.10111
146	0.0900207
146.5	0.0192436
147	0.0156558
147.5	0.00424011
148	0
148.5	0.0156558
149	0.0528383
149.5	0.125246
150	0.264844
150.5	0.360409
151	0.555128
151.5	0.700596
152	0.925648
152.5	1.11482
153	1.25768
153.5	1.43381
154	1.61939
154.5	1.77171
155	2.02286
155.5	2.1318
156	2.2515
156.5	2.50232
157	2.70486
157.5	2.87479
158	2.99156
158.5	3.13638
159	3.22901
159.5	3.19313
160	3.23194
160.5	3.12953
161	2.93546
161.5	2.83011
162	2.60799
162.5	2.365
163	2.12853
163.5	1.90055
164	1.63016
164.5	1.42076
165	1.24007
165.5	1.05481
166	0.92467
166.5	0.819645
167	0.664392
167.5	0.574045
168	0.529361
168.5	0.382914
169	0.326162
169.5	0.309854
170	0.231575
170.5	0.223421
171	0.174823
171.5	0.127529

## Sheet: LD16-8
daylength16_time_hrs	biolum_norm_arb
2.5	0.0311115
3	0.0137101
3.5	0.00158194
4	0
4.5	0.00158194
5	0.0105463
5.5	0.0205652
6	0.0384939
6.5	0.0527313
7	0.087534
7.5	0.118645
8	0.158721
8.5	0.195633
9	0.242037
9.5	0.281058
10	0.331153
10.5	0.378611
11	0.421323
11.5	0.471418
12	0.504639
12.5	0.520458
13	0.52995
13.5	0.526259
14	0.533114
14.5	0.488819
15	0.482492
15.5	0.462981
26.5	0.0643322
27	0.0400758
27.5	0.0216198
28	0.0105463
28.5	0.00949164
29	0.00685507
29.5	0
30	0.00105463
30.5	0.00369119
31	0.010019
31.5	0.0221472
32	0.0395485
32.5	0.0580045
33	0.0822609
33.5	0.116536
34	0.167158
34.5	0.211453
35	0.281585
35.5	0.346445
36	0.439252
36.5	0.515712
37	0.61432
37.5	0.702381
38	0.817863
38.5	0.835264
39	0.955492
39.5	0.987658
50.5	0.112318
51	0.0917525
51.5	0.0611683
52	0.0532586
52.5	0.0384939
53	0.0290022
53.5	0.0163467
54	0.00896432
54.5	0.00105463
55	0.00105463
55.5	0
56	0.0079097
56.5	0.0210925
57	0.062223
57.5	0.108099
58	0.171904
58.5	0.286858
59	0.421323
59.5	0.593755
60	0.819445
60.5	1.06781
61	1.30194
61.5	1.58141
62	1.82187
62.5	2.05863
63	2.30383
63.5	2.56432
74.5	0.338008
75	0.251001
75.5	0.161885
76	0.120755
76.5	0.0885886
77	0.0553679
77.5	0.0311115
78	0.0179286
78.5	0
79	0.010019
79.5	0.0221472
80	0.043767
80.5	0.0817335
81	0.177177
81.5	0.323243
82	0.526786
82.5	0.72611
83	1.0541
83.5	1.39843
84	1.68371
84.5	2.03543
85	2.35814
85.5	2.64289
86	2.97932
86.5	3.1681
87	3.52614
87.5	3.84939
98.5	0.316388
99	0.254165
99.5	0.232018
100	0.165049
100.5	0.104935
101	0.0964983
101.5	0.0279476
102	0.0195106
102.5	0.00421851
103	0
103.5	0.0722419
104	0.0701327
104.5	0.171377
105	0.302678
105.5	0.569498
106	0.808371
106.5	1.04355
107	1.30932
107.5	1.55663
108	1.80394
108.5	2.03068
109	2.25268
109.5	2.48892
110	2.6777
110.5	2.79687
111	3.08267
111.5	3.30309
122.5	0.613265
123	0.479328
123.5	0.466145
124	0.51413
124.5	0.392321
125	0.340117
125.5	0.292132
126	0.240982
126.5	0.269984
127	0.228327
127.5	0.283167
128	0.318497
128.5	0.523095
129	0.648595
129.5	0.898014
130	1.07625
130.5	1.27241
131	1.52024
131.5	1.699
132	1.87934
132.5	2.0175
133	2.26323
133.5	2.44304
134	2.53796
134.5	2.76365
135	2.87069
135.5	3.00041
136	3.08795
136.5	3.17917
137	3.24139
137.5	3.22452
138	3.24192
138.5	3.04049
139	2.86437
139.5	2.65713
140	2.37185
140.5	2.05072
141	1.77705
141.5	1.51708
142	1.20966
142.5	0.969202
143	0.870594
143.5	0.629085
144	0.609574
144.5	0.430815
145	0.365955
145.5	0.30426
146	0.271039
146.5	0.186142
147	0.161358
147.5	0.1139
148	0.069078
148.5	0.0242564
149	0.0179286
149.5	0.00158194
150	0.00369119
150.5	0
151	0.0189833
151.5	0.0601137
152	0.131301
152.5	0.23149
153	0.332735
153.5	0.470363
154	0.630667
154.5	0.774623
155	0.943363
155.5	1.07045
156	1.21177
156.5	1.39896
157	1.55874
157.5	1.69795
158	1.84349
158.5	2.00906
159	2.14458
159.5	2.24846
160	2.41246
160.5	2.49736
161	2.48892
161.5	2.53585
162	2.52478
162.5	2.47784
163	2.4056
163.5	2.27588
164	2.09765
164.5	1.90255
165	1.74646
165.5	1.53237
166	1.29244
166.5	1.14005
167	0.944418
167.5	0.754058
168	0.661778
168.5	0.484074
169	0.400758
169.5	0.36121
170	0.257856
170.5	0.198797
171	0.118645
171.5	0.0833155
