# Supplementary material for: The cyanobacterial circadian clock follows midday in vivo and in vitro
Source: eLife. 2017 Jul 7;6:e23539. doi: 10.7554/eLife.23539 (PMC5605227; doi:10.7554/eLife.23539)
Supplement: Figure 1—source data 5. — DOI: http://dx.doi.org/10.7554/eLife.23539.008 [file elife-23539-fig1-data5.xlsx]

## Sheet: A
num_entraining_LD_cycles	day_length_hrs	peak_time_hrs_after_dawn	peak_time_stdev_hrs
1	8	14.7752	0.348238
1	12	16.094	0.0812404
1	16	17.8603	0.372748
3	8	14.4462	0.18639
3	12	16.1625	0.405494
3	16	18.2963	0.452673
5	8	13.9035	0.427743
5	12	15.0485	0.19721
5	16	17.5547	0.376162
7	8	13.0973	0.274665
7	12	14.1535	0.270847
7	16	17.0417	0.379028

## Sheet: B
num_entraining_LD_cycles	slope_m	stdev_of_m
1	0.382467	0.0225006
3	0.475539	0.0207774
5	0.467507	0.0250685
7	0.46847	0.0211993

## Sheet: C
num_entraining_LD_cycles_parabolic	slope_m	stdev_of_m
1	0.37146	0.0348132
3	0.555376	0.0186757
5	0.566406	0.0225634
7	0.521869	0.0305869

## Sheet: D
day_length_hrs	period_hrs	period_stdev_hrs
8	23.5228	0.542063
12	23.4821	0.586284
16	23.7857	0.576367

## Sheet: E
day_length_hrs	period_hrs	period_stdev_hrs
8	23.6702	0.449262
12	23.6529	1.00014
16	23.746	0.620964
