# Supplementary material for: The cyanobacterial circadian clock follows midday in vivo and in vitro
Source: eLife. 2017 Jul 7;6:e23539. doi: 10.7554/eLife.23539 (PMC5605227; doi:10.7554/eLife.23539)
Supplement: Figure 1—source data 6. — DOI: http://dx.doi.org/10.7554/eLife.23539.009 [file elife-23539-fig1-data6.xlsx]

## Sheet: bioluminescence_traces_purF.csv
daylength8_time_hrs	daylength8_biolum_norm_arb	daylength10_time_hrs	daylength10_biolum_norm_arb	daylength14_time_hrs	daylength14_biolum_norm_arb	daylength18_time_hrs	daylength18_biolum_norm_arb
2.5	0.53901	2.5	0.523969	2.5	0.331488	2.5	0
3	0.497968	3	0.636982	3	0.26817	3	0.0936038
3.5	0.555426	3.5	0.624653	3.5	0.160157	3.5	0.13053
4	0.67855	4	0.581503	4	0.133154	4	0.140835
4.5	0.856396	4.5	0.817802	4.5	0.171331	4.5	0.267072
5	1.0575	5	0.912322	5	0.192747	5	0.204383
5.5	1.29827	5.5	1.36848	5.5	0.307278	5.5	0.331478
6	1.56367	6	1.9582	6	0.516786	6	0.4809
6.5	1.64849	6.5	2.45341	6.5	0.803579	6.5	0.492064
7	1.68269	7	2.49245	7	1.21328	7	0.504945
7.5	1.87285	7.5	3.02053	7.5	1.85764	7.5	0.741961
8	1.89885	8	2.88902	8	2.33438	8	0.878502
8.5	2.02607	8.5	3.37395	8.5	2.98805	8.5	1.2512
9	1.92894	9	3.05957	9	3.12679	9	1.57924
9.5	1.95904	9.5	3.0719	9.5	3.35306	9.5	1.88496
10	2.00692	10	3.09244	10	3.5905	10	2.46032
10.5	2.00419	10.5	3.3534	10.5	3.79442	10.5	3.11812
11	1.90432	11	3.16231	11	3.69385	11	3.49683
11.5	1.83455	11.5	3.15409	11.5	3.73296	11.5	3.94167
12	1.69227	12	2.81916	12	3.40054	12	3.80512
12.5	1.69774	12.5	2.89724	12.5	3.52066	12.5	3.91161
13	1.59514	13	2.67121	13	3.36982	13	3.83518
13.5	1.5541	13.5	2.78012	13.5	3.28043	13.5	3.81371
14	1.51032	14	2.65272	14	3.20873	14	3.73385
14.5	1.47475	14.5	2.34861	14.5	2.96942	14.5	3.47365
15	1.47202	15	2.47806	15	2.9238	15	3.34999
15.5	1.48843	15.5	2.21094	15.5	2.71708	15.5	3.17223
16	1.42003	16	2.35272	16	2.58579	16	3.06059
16.5	1.29554	16.5	2.12875	16.5	2.28596	16.5	2.85706
17	1.17105	17	2.09382	17	2.13139	17	2.71194
17.5	0.933006	17.5	1.92122	17.5	2.05318	17.5	2.6544
18	0.757897	18	1.60067	18	1.80642	18	2.47578
18.5	0.712751	18.5	1.64793	18.5	1.75055	18.5	2.48093
19	0.48976	19	1.0541	19	1.35947	19	2.26453
19.5	0.41999	19.5	0.741775	19.5	1.04009	19.5	2.05156
20	0.544482	20	0.690406	20	0.851998	20	1.96912
20.5	0.556794	20.5	0.694515	20.5	0.675081	20.5	1.98457
21	0.618356	21	0.593831	21	0.500956	21	1.9631
21.5	0.666238	21.5	0.69657	21.5	0.437638	21.5	1.96654
22	0.655293	22	0.550681	22	0.321245	22	1.87465
22.5	0.768841	22.5	0.713009	22.5	0.340799	22.5	1.78363
23	0.742848	23	0.70068	23	0.273757	23	1.61359
23.5	0.746952	23.5	0.585612	23.5	0.242098	23.5	1.35167
24	0.834507	24	0.721228	24	0.249547	24	1.20826
24.5	0.950791	24.5	0.840405	24.5	0.264445	24.5	0.989281
25	1.00825	25	0.819857	25	0.220682	25	0.814096
25.5	1.03151	25.5	0.803419	25.5	0.189954	25.5	0.652651
26	1.04108	26	0.669858	26	0.125705	26	0.480042
26.5	1.2586	26.5	0.74794	26.5	0.191816	26.5	0.416494
27	1.43371	27	0.807528	27	0.225337	27	0.323749
27.5	1.89474	27.5	1.0541	27.5	0.263514	27.5	0.340065
28	2.27779	28	1.20616	28	0.297967	28	0.260202
28.5	2.62117	28.5	1.40136	28.5	0.360353	28.5	0.241309
29	2.95908	29	1.61917	29	0.415291	29	0.17175
29.5	3.21901	29.5	1.84725	29.5	0.541927	29.5	0.166598
30	3.41053	30	2.04862	30	0.667631	30	0.136541
30.5	3.54734	30.5	2.16163	30.5	0.825926	30.5	0.164021
31	3.87841	31	2.8171	31	1.20863	31	0.358099
31.5	3.78812	31.5	2.83354	31.5	1.34644	31.5	0.345218
32	3.69919	32	2.87875	32	1.46376	32	0.37098
32.5	3.82642	32.5	3.29792	32.5	1.73845	32.5	0.624312
33	3.66362	33	3.29998	33	1.81015	33	0.824401
33.5	3.63489	33.5	3.4171	33.5	1.95075	33.5	1.11981
34	3.35445	34	3.27121	34	1.88185	34	1.28813
34.5	3.35581	34.5	3.44792	34.5	2.05131	34.5	1.58869
35	3.24227	35	3.44792	35	2.01779	35	1.88753
35.5	3.11504	35.5	3.4397	35.5	2.03362	35.5	2.11081
36	2.8811	36	3.18696	36	1.91164	36	2.17951
36.5	2.83869	36.5	3.44997	36.5	2.015	36.5	2.31605
37	2.66358	37	3.21573	37	1.83529	37	2.31004
37.5	2.50215	37.5	3.0308	37.5	1.76452	37.5	2.28771
38	2.37356	38	2.89929	38	1.71238	38	2.21987
38.5	2.29147	38.5	2.85203	38.5	1.65744	38.5	2.10909
39	2.18887	39	2.75546	39	1.59412	39	2.0318
39.5	2.14509	39.5	2.63628	39.5	1.52615	39.5	2.00261
40	2.06438	40	2.39176	40	1.33619	40	1.88753
40.5	2.0165	40.5	2.26026	40.5	1.15741	40.5	1.80252
41	1.91253	41	2.19245	41	0.973978	41	1.71664
41.5	1.77162	41.5	2.22327	41.5	0.80451	41.5	1.68659
42	1.43781	42	1.65821	42	0.579173	42	1.53716
42.5	1.43645	42.5	1.72191	42.5	0.543789	42.5	1.52257
43	1.17105	43	1.4178	43	0.418084	43	1.41608
43.5	1.10128	43.5	1.17739	43.5	0.319383	43.5	1.31561
44	1.00551	44	1.12191	44	0.283999	44	1.27095
44.5	1.00551	44.5	1.1178	44.5	0.246754	44.5	1.17305
45	0.789362	45	0.8815	45	0.14619	45	1.12926
45.5	0.7278	45.5	0.865062	45.5	0.148052	45.5	1.07945
46	0.514385	46	0.680132	46	0.126636	46	0.943767
46.5	0.632037	46.5	0.780816	46.5	0.135947	46.5	0.93518
47	0.584155	47	0.673968	47	0.144328	47	0.772876
47.5	0.693599	47.5	0.811638	47.5	0.13781	47.5	0.681848
48	0.521225	48	0.597941	48	0.103357	48	0.571928
48.5	0.411781	48.5	0.526024	48.5	0.0716982	48.5	0.461149
49	0.744216	49	0.64931	49	0.0884588	49	0.404472
49.5	0.87418	49.5	0.735611	49.5	0.0819408	49.5	0.383003
50	0.849556	50	0.608215	50	0.0530753	50	0.308292
50.5	0.775681	50.5	0.410956	50.5	0.0102426	50.5	0.206959
51	1.31332	51	0.645201	51	0.0223475	51	0.243885
51.5	1.59924	51.5	0.817802	51.5	0.0372458	51.5	0.249038
52	1.64439	52	0.60205	52	0	52	0.170033
52.5	2.13689	52.5	0.854788	52.5	0.0474884	52.5	0.200948
53	2.42281	53	1.0315	53	0.117324	53	0.177761
53.5	2.77029	53.5	1.26369	53.5	0.16295	53.5	0.173468
54	2.89341	54	1.43835	54	0.241167	54	0.170891
54.5	3.1725	54.5	1.77122	54.5	0.369665	54.5	0.154575
55	3.19302	55	1.92533	55	0.500025	55	0.207818
55.5	3.09862	55.5	2.01368	55.5	0.631317	55.5	0.25419
56	3.03159	56	2.02807	56	0.70674	56	0.272224
56.5	3.10683	56.5	2.29313	56.5	0.82872	56.5	0.33663
57	3.07126	57	2.44313	57	0.946044	57	0.465443
57.5	2.98781	57.5	2.57464	57.5	1.01029	57.5	0.591679
58	2.81407	58	2.4945	58	1.06989	58	0.796062
58.5	2.68958	58.5	2.54382	58.5	1.13693	58.5	0.897395
59	2.6841	59	2.69793	59	1.14438	59	1.03479
59.5	2.51583	59.5	2.58902	59.5	1.1332	59.5	1.13527
60	2.47616	60	2.64245	60	1.18628	60	1.23145
60.5	2.23949	60.5	2.49245	60.5	1.11551	60.5	1.32677
61	2.12868	61	2.35683	61	1.14065	61	1.31389
61.5	2.11363	61.5	2.42464	61.5	1.14624	61.5	1.35253
62	1.99461	62	2.27875	62	1.10341	62	1.35597
62.5	1.89611	62.5	2.30341	62.5	1.11644	62.5	1.32076
63	1.65944	63	2.00136	63	1.0345	63	1.29242
63.5	1.54589	63.5	2.01368	63.5	1.02612	63.5	1.24004
64	1.41866	64	1.84519	64	0.911592	64	1.18508
64.5	1.18883	64.5	1.55958	64.5	0.875277	64.5	1.13441
65	1.08896	65	1.40752	65	0.838962	65	1.09834
65.5	1.0575	65.5	1.35204	65.5	0.743054	65.5	1.07601
66	0.879653	66	1.09314	66	0.671356	66	0.999586
66.5	0.681286	66.5	0.918486	66.5	0.638766	66.5	0.905982
67	0.658029	67	0.733556	67	0.595933	67	0.876785
67.5	0.478816	67.5	0.60616	67.5	0.562412	67.5	0.820107
68	0.484288	68	0.509585	68	0.530753	68	0.772017
68.5	0.212047	68.5	0.339039	68.5	0.508406	68.5	0.715339
69	0.292762	69	0.336984	69	0.491645	69	0.670684
69.5	0.205207	69.5	0.209588	69.5	0.486989	69.5	0.632041
70	0.091659	70	0.172601	70	0.470229	70	0.604561
70.5	0.127228	70.5	0.133561	70.5	0.493507	70.5	0.589962
71	0	71	0.0287669	71	0.467435	71	0.554753
71.5	0.0123124	71.5	0	71.5	0.464642	71.5	0.547883
