# Supplementary material for: The cyanobacterial circadian clock follows midday in vivo and in vitro
Source: eLife. 2017 Jul 7;6:e23539. doi: 10.7554/eLife.23539 (PMC5605227; doi:10.7554/eLife.23539)
Supplement: Figure 1—source data 7. — DOI: http://dx.doi.org/10.7554/eLife.23539.010 [file elife-23539-fig1-data7.xlsx]

## Sheet: peak_time_vs_daylength_purF.csv
peak_num	day_length_hrs	peak_time_hrs_after_dawn	peak_time_stdev_hrs
1	4	10.86	NaN
1	6	10.865	0.507193
1	8	10.6571	0.23468
1	9	10.8275	0.261327
1	10	11.1475	0.200248
1	11	11.5557	0.142208
1	12	7.06667	0.120462
1	13	10.2725	0.390516
1	14	11.6275	0.167607
1	16	12.6538	0.18733
1	18	14.0914	0.149657
1	20	15.5743	0.232459
2	4	33.63	NaN
2	6	33.505	0.393597
2	8	33.5143	0.389932
2	9	34.0812	0.414541
2	10	34.2925	0.358831
2	11	34.7686	0.189692
2	12	32.5483	0.438044
2	13	33.9663	0.459083
2	14	35.1575	0.232922
2	16	36.8075	0.313413
2	18	38.6171	0.221141
2	20	39.7457	0.260712
3	4	56.59	NaN
3	6	56.295	0.225163
3	8	57.4629	0.31101
3	9	58.0887	0.371317
3	10	58.585	0.306332
3	11	59.3957	0.273408
3	12	57.3383	0.311442
3	13	58.59	0.439919
3	14	60.1713	0.28352
3	16	61.8212	0.263665
3	18	62.8043	0.245249
3	20	63.6786	0.450748
