# Supplementary material for: The cyanobacterial circadian clock follows midday in vivo and in vitro
Source: eLife. 2017 Jul 7;6:e23539. doi: 10.7554/eLife.23539 (PMC5605227; doi:10.7554/eLife.23539)
Supplement: Figure 2—source data 2. — DOI: http://dx.doi.org/10.7554/eLife.23539.017 [file elife-23539-fig2-data2.xlsx]

## Sheet: Fig2C-in_vitro_and_in_vivo_entr
trial	day_length	peak_time	peak_time_error
%P-KaiC	6	5.94	0.352137
%P-KaiC	8	7.6022	0.481765
%P-KaiC	10	8.43267	0.314867
%P-KaiC	12	9.50882	0.311197
%P-KaiC	14	10.3786	0.282507
%P-KaiC	18	12.1922	0.359786
fluor. pol. 1	6	16.9988	0.378506
fluor. pol. 1	8	17.5702	0.36799
fluor. pol. 1	10	18.6002	0.36658
fluor. pol. 1	12	19.2623	0.371304
fluor. pol. 1	14	20.0881	0.383342
fluor. pol. 2	5.5	19.9897	0.278333
fluor. pol. 2	7.5	18.4429	0.28244
fluor. pol. 2	9.5	19.426	0.280443
fluor. pol. 2	11.5	20.0484	0.27773
fluor. pol. 2	13.5	20.8305	0.279759
fluor. pol. 2	15.5	21.3272	0.282055
in vivo lum.	4	13.795	0.388544
in vivo lum.	6	12.96	0.276526
in vivo lum.	8	13.2587	0.522725
in vivo lum.	9	13.275	0.375462
in vivo lum.	10	13.7425	0.282173
in vivo lum.	11	14.305	0.237787
in vivo lum.	12	14.6175	0.438561
in vivo lum.	13	15.1375	0.425399
in vivo lum.	14	15.6062	0.401673
in vivo lum.	16	16.905	0.524704
in vivo lum.	18	18.36	0.415555
in vivo lum.	20	19.0487	0.499212
