# Supplementary material for: The cyanobacterial circadian clock follows midday in vivo and in vitro
Source: eLife. 2017 Jul 7;6:e23539. doi: 10.7554/eLife.23539 (PMC5605227; doi:10.7554/eLife.23539)
Supplement: Figure 2—source data 3. — DOI: http://dx.doi.org/10.7554/eLife.23539.018 [file elife-23539-fig2-data3.xlsx]

## Sheet: Phosphorylation data
rxnA_time_hrs	rxnA_gel_percentKaiCphospho	rxnB_time_hrs	rxnB_gel_percentKaiCphospho
21.3075	9.44496	21.3075	51.2001
25.2822	31.9183	25.2822	26.4555
29.4172	64.9132	29.4172	12.0877
33.3267	49.0086	33.3267	3.61639
37.1425	26.0827	37.1425	29.0274
46.1592	11.1645	46.1592	38.0476

## Sheet: Polarization data
rxnA_time_hrs	rxnA_polarization_mP	rxnB_time_hrs	rxnB_polarization_mP
0.250056	126	0.250056	172
0.500056	123	0.500056	171
0.750056	132	0.750056	172
1.00006	132	1.00006	170
1.25006	131	1.25006	170
1.50006	132	1.50006	170
1.75008	131	1.75008	168
2.00008	132	2.00008	168
2.25008	133	2.25008	167
2.50008	133	2.50008	165
2.75008	132	2.75008	165
3.00011	134	3.00011	164
3.25011	135	3.25011	161
3.50011	134	3.50011	161
3.75011	135	3.75011	161
4.00011	135	4.00011	159
4.25011	145	4.25011	157
4.50011	144	4.50011	156
4.75014	145	4.75014	156
5.00014	146	5.00014	154
5.25014	147	5.25014	152
5.50014	145	5.50014	151
5.75014	147	5.75014	151
6.00014	148	6.00014	150
6.25014	148	6.25014	149
6.50017	149	6.50017	148
6.75017	149	6.75017	149
7.00017	149	7.00017	148
7.25017	150	7.25017	147
7.50017	150	7.50017	145
7.75017	151	7.75017	146
8.00019	151	8.00019	146
8.25019	152	8.25019	145
8.50019	155	8.50019	144
8.75019	155	8.75019	145
9.00019	155	9.00019	145
9.25019	157	9.25019	145
9.50019	158	9.50019	145
9.75022	159	9.75022	145
10.0002	161	10.0002	144
10.2502	164	10.2502	145
10.5002	164	10.5002	144
10.7502	165	10.7502	145
11.0002	166	11.0002	144
11.2503	167	11.2503	145
11.5003	167	11.5003	144
11.7503	168	11.7503	144
12.0003	169	12.0003	144
12.2503	169	12.2503	145
12.5003	169	12.5003	146
12.7503	171	12.7503	146
13.0003	170	13.0003	145
13.2503	171	13.2503	143
13.5003	171	13.5003	144
13.7503	169	13.7503	145
14.0003	169	14.0003	144
14.2503	169	14.2503	145
14.5003	169	14.5003	144
14.7503	168	14.7503	144
15.0003	167	15.0003	145
15.2503	167	15.2503	144
15.5003	165	15.5003	144
15.7503	164	15.7503	145
16.0003	163	16.0003	144
16.2503	162	16.2503	145
16.5003	160	16.5003	145
16.7503	159	16.7503	144
17.0003	159	17.0003	144
17.2503	158	17.2503	144
17.5004	155	17.5004	144
17.7504	155	17.7504	146
18.0004	154	18.0004	145
18.2504	153	18.2504	146
18.5004	154	18.5004	147
18.7504	153	18.7504	146
19.0004	150	19.0004	147
19.2504	150	19.2504	149
19.5004	151	19.5004	150
19.7504	149	19.7504	150
20.0004	148	20.0004	149
20.2504	148	20.2504	151
20.5004	148	20.5004	152
20.7504	148	20.7504	154
21.0004	147	21.0004	154
21.2504	148	21.2504	155
21.3075	152	21.3075	158
21.5576	150	21.5576	158
21.8076	149	21.8076	157
22.0576	148	22.0576	159
22.3076	148	22.3076	159
22.5576	148	22.5576	159
22.8076	147	22.8076	162
23.0576	148	23.0576	162
23.3076	148	23.3076	164
23.5576	148	23.5576	164
23.8076	147	23.8076	167
24.0576	147	24.0576	167
24.3076	147	24.3076	167
24.5576	146	24.5576	167
24.8076	148	24.8076	167
25.0576	148	25.0576	169
25.2822	151	25.2822	169
25.5323	150	25.5323	171
25.7823	148	25.7823	169
26.0323	147	26.0323	168
26.2823	148	26.2823	167
26.5323	147	26.5323	165
26.7823	148	26.7823	167
27.0323	148	27.0323	165
27.2823	148	27.2823	164
27.5323	148	27.5323	163
27.7823	148	27.7823	163
28.0323	150	28.0323	160
28.2823	148	28.2823	159
28.5323	149	28.5323	159
28.7823	147	28.7823	161
29.0323	147	29.0323	159
29.2823	147	29.2823	159
29.4172	151	29.4172	159
29.6673	151	29.6673	159
29.9173	150	29.9173	157
30.1673	149	30.1673	156
30.4173	150	30.4173	155
30.6673	151	30.6673	155
30.9173	150	30.9173	153
31.1673	151	31.1673	152
31.4173	153	31.4173	151
31.6673	153	31.6673	152
31.9173	153	31.9173	151
32.1673	154	32.1673	150
32.4173	156	32.4173	150
32.6673	156	32.6673	150
32.9173	157	32.9173	150
33.1673	158	33.1673	149
33.3267	162	33.3267	150
33.5767	161	33.5767	150
33.8267	162	33.8267	150
34.0767	162	34.0767	148
34.3267	163	34.3267	148
34.5767	163	34.5767	148
34.8267	166	34.8267	148
35.0768	166	35.0768	148
35.3268	167	35.3268	149
35.5768	168	35.5768	148
35.8268	168	35.8268	147
36.0768	170	36.0768	148
36.3268	169	36.3268	149
36.5768	169	36.5768	146
36.8268	170	36.8268	148
37.0768	171	37.0768	148
37.1425	175	37.1425	152
37.3926	174	37.3926	150
37.6426	171	37.6426	148
37.8926	170	37.8926	148
38.1426	169	38.1426	148
38.3926	171	38.3926	148
38.6426	169	38.6426	149
38.8926	170	38.8926	149
39.1426	168	39.1426	149
39.3926	166	39.3926	148
39.6426	166	39.6426	149
39.8926	165	39.8926	149
40.1426	162	40.1426	150
40.3926	163	40.3926	149
40.6426	161	40.6426	148
40.8926	160	40.8926	149
41.1426	159	41.1426	148
41.3926	158	41.3926	149
41.6426	158	41.6426	148
41.8926	157	41.8926	149
42.1426	156	42.1426	148
42.3926	155	42.3926	149
42.6426	151	42.6426	150
42.8926	153	42.8926	150
43.1426	153	43.1426	150
43.3926	151	43.3926	150
43.6427	151	43.6427	152
43.8927	149	43.8927	152
44.1427	151	44.1427	152
44.3927	150	44.3927	154
44.6427	149	44.6427	155
44.8927	149	44.8927	155
45.1427	150	45.1427	158
45.3927	148	45.3927	157
45.6427	149	45.6427	159
45.8927	148	45.8927	160
46.1592	152	46.1592	164
46.4092	150	46.4092	163
46.6592	148	46.6592	164
46.9092	147	46.9092	163
47.1592	148	47.1592	165
47.4092	149	47.4092	165
47.6593	147	47.6593	168
47.9093	147	47.9093	167
48.1593	148	48.1593	167
48.4093	148	48.4093	168
48.6593	149	48.6593	169
48.9093	147	48.9093	170
49.1593	148	49.1593	170
49.4093	148	49.4093	170
49.6593	149	49.6593	170
49.9093	149	49.9093	172
50.1593	149	50.1593	169
50.4093	148	50.4093	169
50.6593	147	50.6593	168
50.9093	147	50.9093	168
51.1593	147	51.1593	168
51.4093	149	51.4093	168
51.6593	148	51.6593	167
51.9093	149	51.9093	165
52.1593	148	52.1593	165
52.4093	148	52.4093	162
52.6593	148	52.6593	162
52.9093	148	52.9093	161
53.1593	147	53.1593	159
53.4093	148	53.4093	158
53.6593	150	53.6593	157
53.9094	150	53.9094	158
54.1594	148	54.1594	156
54.4094	149	54.4094	155
54.6594	149	54.6594	153
54.9094	150	54.9094	154
55.1594	150	55.1594	152
55.4094	151	55.4094	151
55.6594	153	55.6594	151
55.9094	153	55.9094	150
56.1594	153	56.1594	150
56.4094	155	56.4094	151
56.6594	156	56.6594	150
56.9094	156	56.9094	148
57.1594	159	57.1594	150
57.4094	159	57.4094	150
57.6594	161	57.6594	149
57.9094	161	57.9094	150
58.1594	161	58.1594	149
58.4094	162	58.4094	149
58.6594	165	58.6594	151
58.9094	164	58.9094	147
59.1594	165	59.1594	147
59.4094	166	59.4094	149
59.6594	169	59.6594	148
59.9094	170	59.9094	146
60.1594	169	60.1594	148
60.4095	169	60.4095	148
60.6595	170	60.6595	147
60.9095	171	60.9095	147
61.1595	170	61.1595	150
61.4095	171	61.4095	147
61.6595	171	61.6595	148
61.9095	169	61.9095	148
62.1595	170	62.1595	149
62.4095	169	62.4095	147
62.6595	167	62.6595	148
62.9095	168	62.9095	147
63.1595	167	63.1595	148
63.4095	165	63.4095	149
63.6595	165	63.6595	147
63.9095	164	63.9095	149
64.1595	163	64.1595	148
64.4095	163	64.4095	149
64.6595	161	64.6595	149
64.9095	161	64.9095	148
65.1596	159	65.1596	148
65.4096	159	65.4096	149
65.6596	158	65.6596	149
65.9096	156	65.9096	150
66.1596	156	66.1596	150
66.4096	155	66.4096	149
66.6596	154	66.6596	150
66.9096	153	66.9096	149
67.1596	152	67.1596	151
67.4096	152	67.4096	150
67.6596	152	67.6596	151
67.9096	151	67.9096	152
68.1596	150	68.1596	154
68.4096	149	68.4096	153
68.6596	149	68.6596	154
68.9096	149	68.9096	155
69.1596	148	69.1596	155
69.4096	149	69.4096	157
69.6596	149	69.6596	158
69.9096	149	69.9096	159
70.1596	148	70.1596	160
70.4096	148	70.4096	160
70.6596	148	70.6596	161
70.9096	148	70.9096	163
71.1596	148	71.1596	163
71.4096	148	71.4096	165
71.6596	149	71.6596	167
71.9097	148	71.9097	168
72.1597	148	72.1597	167
