# Supplementary material for: The cyanobacterial circadian clock follows midday in vivo and in vitro
Source: eLife. 2017 Jul 7;6:e23539. doi: 10.7554/eLife.23539 (PMC5605227; doi:10.7554/eLife.23539)
Supplement: Figure 3—source data 2. — DOI: http://dx.doi.org/10.7554/eLife.23539.022 [file elife-23539-fig3-data2.xlsx]

## Sheet: step down function
Rep1_stepTime	Rep1_phaseShift	Rep2_stepTime	Rep2_phaseShift
0.857659	1.59795	0.328258	0.445333
3.13504	0.706161	2.23622	-0.161668
4.9268	0.264685	4.14418	-0.588635
6.953	-1.56638	6.28852	-2.37572
8.6997	-1.63684	7.47366	-3.12634
9.01268	-0.880862	8.3991	-1.72986
11.0608	-0.0261915	9.53358	-1.35146
12.9195	1.49686	11.813	-0.209498
15.1969	1.98715	13.721	0.538505
16.9887	2.2721	15.6289	1.07824
19.0149	3.09909	17.7733	2.1311
20.6378	3.23888	19.8838	3.31417
21.0746	2.97711	19.9889	1.15603
22.9989	2.31478	22.0488	1.54818
24.8577	1.59795	24.3283	0.445333
27.135	0.706161	26.2362	-0.161668
28.9268	0.264685	28.1442	-0.588635
30.953	-1.56638	30.2885	-2.37572
32.6997	-1.63684	31.4737	-3.12634
33.0127	-0.880862	32.3991	-1.72986
35.0608	-0.0261915	33.5336	-1.35146
36.9195	1.49686	35.813	-0.209498
39.1969	1.98715	37.721	0.538505
40.9887	2.2721	39.6289	1.07824
43.0149	3.09909	41.7733	2.1311
44.6378	3.23888	43.8838	3.31417
45.0746	2.97711	43.9889	1.15603
46.9989	2.31478	46.0488	1.54818
48.8577	1.59795	48.3283	0.445333
51.135	0.706161	50.2362	-0.161668
52.9268	0.264685	52.1442	-0.588635
54.953	-1.56638	54.2885	-2.37572
57.0127	-0.880862	56.3991	-1.72986

## Sheet: step down arrows
day_length	dusk_time_CT	dusk_arrow_top_CT
6	9.52553	-3
8	10.9645	-3
10	11.9596	-3
12	13.3108	-3
14	14.5035	-3
15.5	14.6224	-3

## Sheet: step up function
Rep1_stepTime	Rep1_phaseShift	Rep2_stepTime	Rep2_phaseShift
-0.118934	-1.25486	-0.592885	-0.858444
1.74947	-0.608664	1.50723	-0.514961
3.60217	0.325166	3.2651	0.279118
5.76888	1.18001	5.02298	0.986885
7.14396	-0.34735	6.99864	1.91599
8.80825	1.53812	8.94319	2.48975
10.7238	0.768038	9.66551	2.58385
12.5137	-0.0547282	11.5634	2.49506
14.4449	-1.95899	13.6635	1.15626
16.3604	-2.65447	15.4214	-1.03588
18.1817	-2.78517	17.1793	-1.98664
20.1286	-2.44222	19.1549	-1.95124
22.1854	-1.80613	21.0995	-1.20259
23.8811	-1.25486	21.5092	-1.90982
25.7495	-0.608664	23.4071	-0.858444
27.6022	0.325166	25.5072	-0.514961
29.7689	1.18001	27.2651	0.279118
31.144	-0.34735	29.023	0.986885
32.8083	1.53812	30.9986	1.91599
34.7238	0.768038	32.9432	2.48975
36.5137	-0.0547282	33.6655	2.58385
38.4449	-1.95899	35.5634	2.49506
40.3604	-2.65447	37.6635	1.15626
42.1817	-2.78517	39.4214	-1.03588
44.1286	-2.44222	41.1793	-1.98664
46.1854	-1.80613	43.1549	-1.95124
47.8811	-1.25486	45.0995	-1.20259
49.7495	-0.608664	45.5092	-1.90982
51.6022	0.325166	47.4071	-0.858444
53.7689	1.18001	49.5072	-0.514961
	51.2651	0.279118
	53.023	0.986885
	54.9986	1.91599
	56.9432	2.48975

## Sheet: step up arrows
day_length	dawn_time_CT	dawn_arrow_top_CT
6	27.5498	-3
8	26.9968	-3
10	26	-3
12	25.3593	-3
14	24.5601	-3
15.5	23.185	-3
