# Supplementary material for: The cyanobacterial circadian clock follows midday in vivo and in vitro
Source: eLife. 2017 Jul 7;6:e23539. doi: 10.7554/eLife.23539 (PMC5605227; doi:10.7554/eLife.23539)
Supplement: Figure 3—source data 3. — DOI: http://dx.doi.org/10.7554/eLife.23539.023 [file elife-23539-fig3-data3.xlsx]

## Sheet: step down arrows
day_length	dusk_time_CT	dusk_phaseshift_CT
6	12.0048	4.62915
8	12.3504	4.97437
10	13.4592	6.08195
12	14.3256	6.75055
14	15.516	7.21639
18	17.724	8.08044

## Sheet: step down function
step_down_time	step_down_time_err	step_down_phaseshift	step_down_phaseshift_err
-41.3797	0.51563	-4.20031	2.03191
-38.1531	0.543949	2.47365	1.94422
-33.9984	0.53697	6.62376	1.0232
-29.8437	0.530627	8.2496	0.95857
-27.7664	0.527701	10.7368	0.876166
-25.6891	0.524942	10.7361	0.917754
-23.6117	0.522353	10.785	1.27639
-21.5344	0.519936	9.63142	1.09972
-18.3077	0.551538	13.5154	1.10689
-17.3797	0.51563	-4.20031	2.03191
-14.1531	0.543949	2.47365	1.94422
-9.9984	0.53697	6.62376	1.0232
-5.84373	0.530627	8.2496	0.95857
-3.76639	0.527701	10.7368	0.876166
-1.68905	0.524942	10.7361	0.917754
0.388283	0.522353	10.785	1.27639
2.46562	0.519936	9.63142	1.09972
5.69225	0.551538	13.5154	1.10689
6.62029	0.51563	-4.20031	2.03191
9.84693	0.543949	2.47365	1.94422
14.0016	0.53697	6.62376	1.0232
18.1563	0.530627	8.2496	0.95857
20.2336	0.527701	10.7368	0.876166
22.3109	0.524942	10.7361	0.917754
24.3883	0.522353	10.785	1.27639
26.4656	0.519936	9.63142	1.09972
29.6923	0.551538	13.5154	1.10689
30.6203	0.51563	-4.20031	2.03191
33.8469	0.543949	2.47365	1.94422
38.0016	0.53697	6.62376	1.0232
42.1563	0.530627	8.2496	0.95857
44.2336	0.527701	10.7368	0.876166
46.3109	0.524942	10.7361	0.917754
48.3883	0.522353	10.785	1.27639
50.4656	0.519936	9.63142	1.09972
53.6923	0.551538	13.5154	1.10689

## Sheet: step up arrows
day_length	dawn_time_CT	dawn_phaseshift_CT
6	30.0168	-1.74934
8	28.368	-1.34473
10	27.48	-1.24411
12	26.2992	-2.02647
14	25.4856	-2.56554
18	23.6856	-3.75817

## Sheet: step up function
step_up_time	step_up_time_err	step_up_phaseshift	step_up_phaseshift_err
-41.7326	0.527244	-1.81084	0.747839
-40.1225	0.219798	0.918039	0.269112
-39.5984	0.496515	-0.28096	0.655958
-37.4642	0.466163	0.326358	0.64043
-35.3301	0.436267	0.60892	0.662318
-33.1959	0.406926	0.390068	0.468774
-28.9275	0.350471	-7.04418	0.545286
-24.6592	0.29838	-3.98661	0.600747
-20.3908	0.253359	-1.15852	0.503823
-17.7326	0.527244	-1.81084	0.747839
-16.1225	0.219798	0.918039	0.269112
-15.5984	0.496515	-0.28096	0.655958
-13.4642	0.466163	0.326358	0.64043
-11.3301	0.436267	0.60892	0.662318
-9.19588	0.406926	0.390068	0.468774
-4.92753	0.350471	-7.04418	0.545286
-0.659173	0.29838	-3.98661	0.600747
3.60918	0.253359	-1.15852	0.503823
6.26741	0.527244	-1.81084	0.747839
7.87753	0.219798	0.918039	0.269112
8.40159	0.496515	-0.28096	0.655958
10.5358	0.466163	0.326358	0.64043
12.6699	0.436267	0.60892	0.662318
14.8041	0.406926	0.390068	0.468774
19.0725	0.350471	-7.04418	0.545286
23.3408	0.29838	-3.98661	0.600747
27.6092	0.253359	-1.15852	0.503823
30.2674	0.527244	-1.81084	0.747839
31.8775	0.219798	0.918039	0.269112
32.4016	0.496515	-0.28096	0.655958
34.5358	0.466163	0.326358	0.64043
36.6699	0.436267	0.60892	0.662318
38.8041	0.406926	0.390068	0.468774
43.0725	0.350471	-7.04418	0.545286
47.3408	0.29838	-3.98661	0.600747
51.6092	0.253359	-1.15852	0.503823
