# Supplementary material for: The cyanobacterial circadian clock follows midday in vivo and in vitro
Source: eLife. 2017 Jul 7;6:e23539. doi: 10.7554/eLife.23539 (PMC5605227; doi:10.7554/eLife.23539)
Supplement: Figure 5—source data 1. — DOI: http://dx.doi.org/10.7554/eLife.23539.034 [file elife-23539-fig5-data1.xlsx]

## Sheet: PRC
DP_duration_hrs	DP_time_hrs	Phase_shift_hrs	Phase_Shift_StdErr_hrs	Phase_Shift_Std_hrs
12	60	0.317083	0.271416	1.10002
12	63	2.34458	0.235654	1.03197
12	66	4.32083	0.283423	1.12398
12	69	7.10083	0.204179	0.976839
12	72	10.9483	0.240158	1.04024
12	75	-8.75661	0.403097	1.38586
12	78	-4.37277	0.248323	1.05547
12	81	-1.94792	0.205271	0.978668
12	84	0.115833	0.2243	1.01153

## Sheet: wedge
DP_duration_hrs	DP_time_hrs	Phase_shift_hrs	Phase_Shift_StdErr_hrs	Phase_Shift_Std_hrs
8	60	-2.19937	0.379166	1.30631
10	60	-2.42562	0.356835	1.25497
12	60	-1.81687	0.309759	1.15061
14	60	-1.17187	0.277654	1.08307
16	60	-0.194375	0.282275	1.09258
8	63	-0.328125	0.387941	1.32676
10	63	0.075625	0.289674	1.10797
12	63	0.565625	0.312799	1.15718
14	63	1.43476	0.274509	1.07664
16	63	1.92646	0.311269	1.15387

## Sheet: entrainment
day_length_tau_hrs	period_T_hrs	peak_time_hrs_after_dawn	peak_time_stderr_hrs	peak_time_stdev_hrs
8	22	14.7238	0.218354	0.617598
10	22	16.333	0.147906	0.391323
12	22	16.8418	0.207179	0.58599
8	23	14.2888	0.180737	0.511201
10	23	15.1187	0.125221	0.331303
12	23	15.9101	0.175983	0.465608
14	23	16.795	0.0800669	0.226463
8	24	12.7071	0.168307	0.445298
10	24	13.6459	0.197529	0.522612
12	24	14.8855	0.264344	0.747677
14	24	14.9375	0.169535	0.479516
8	25	11.0612	0.21646	0.612243
10	25	12.0401	0.404797	1.07099
12	25	12.8873	0.233532	0.617869
14	25	14.9742	0.133489	0.377565
8	26	9	0.584494	1.01237
10	26	10.1487	0.175199	0.463532
12	26	11.2516	0.222126	0.587691
14	26	12.3117	0.229506	0.649141
