# Supplementary material for: The cyanobacterial circadian clock follows midday in vivo and in vitro
Source: eLife journal article supplement (doi:10.7554/elife.23539), 2017-07-07

**Figure 6—figure supplement 2.**

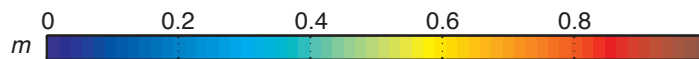

**A. attraction to circular orbit on timescale  $t_{1/2}$**

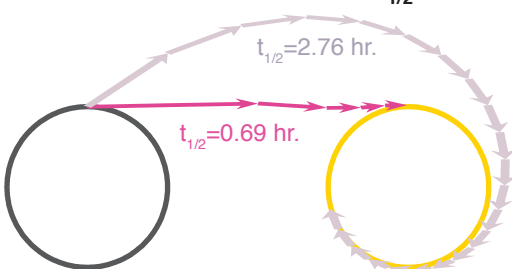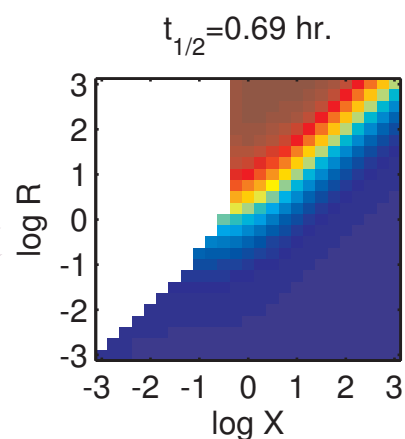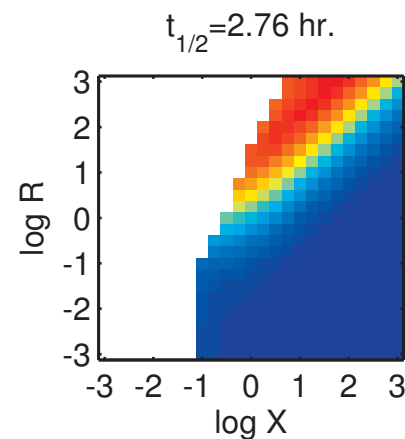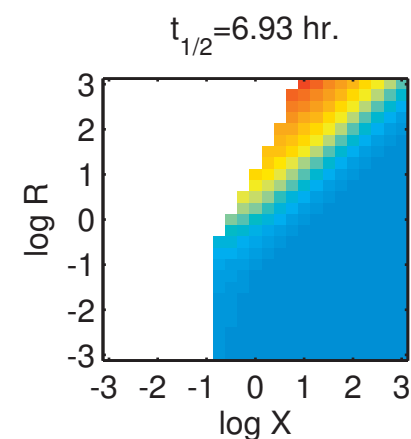

**B. attraction to elliptical orbit**

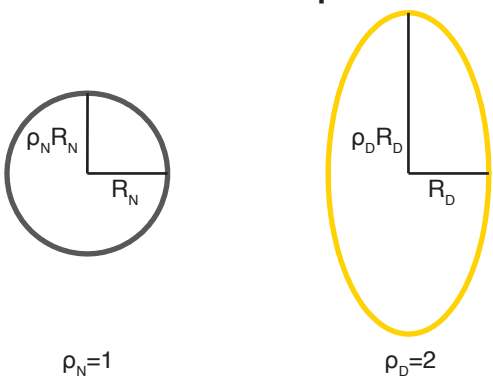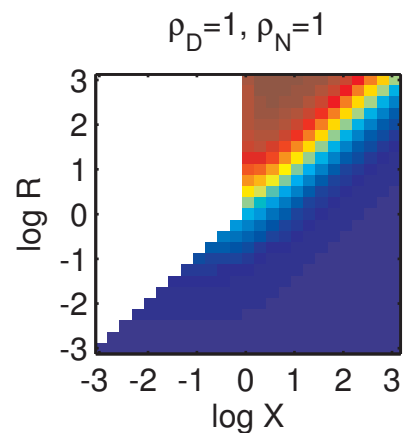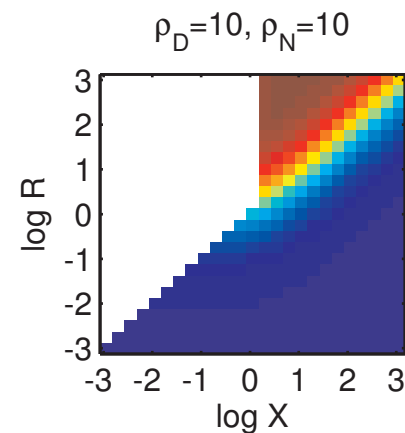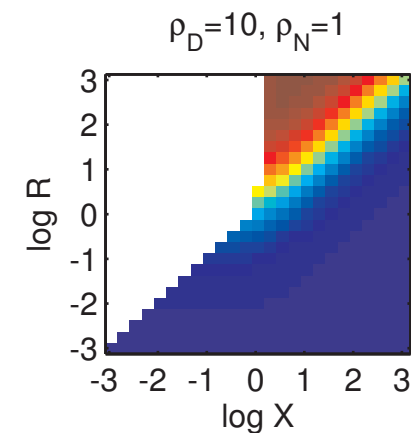

**C. attraction to circular orbit with varying angular velocity**

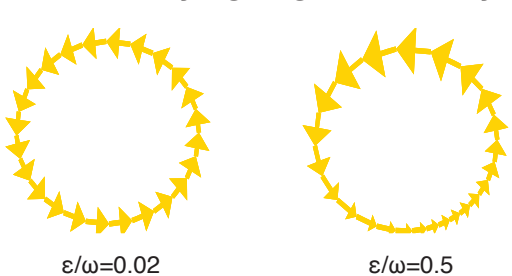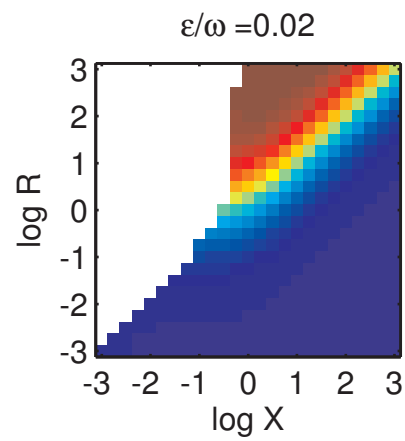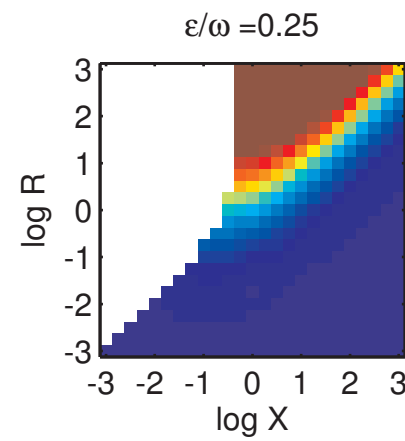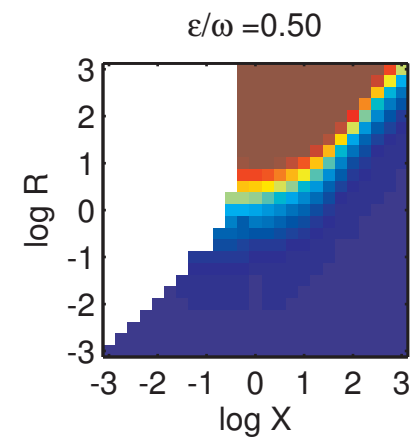

Supplement: supp [file elife-23539-supp-v1.zip]
