# Supplementary figures and images for: The cyanobacterial circadian clock follows midday in vivo and in vitro
Source: eLife journal article supplement (doi:10.7554/elife.23539), 2017-07-07

**Figure 6—figure supplement 1.**

**A.**  $\log R = -1$ ,  $\log X = 0.5$ ,  $m \approx 0$

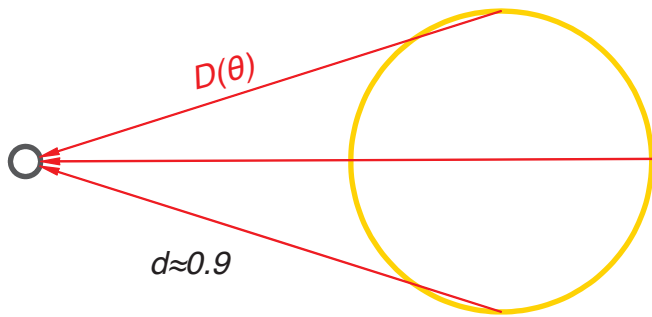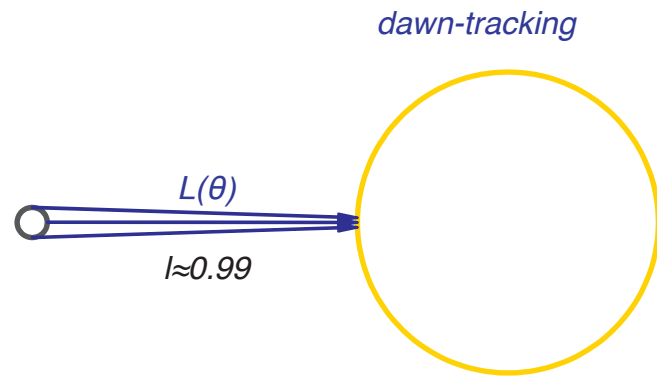

**B.**  $\log R = 0.4$ ,  $\log X = 0.5$ ,  $m \approx 0.4$

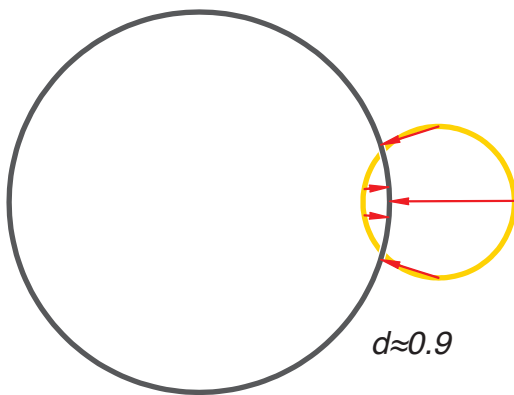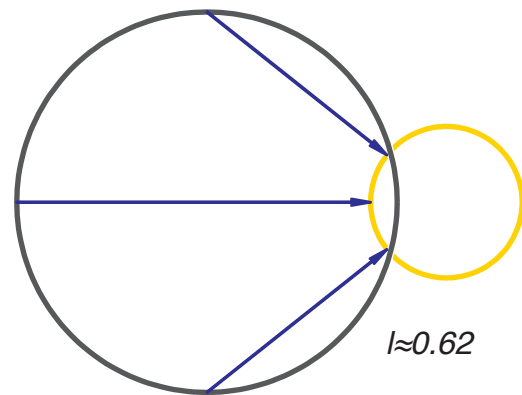

**C.**  $\log R = 1.5$ ,  $\log X = 0.5$ ,  $m \approx 1$

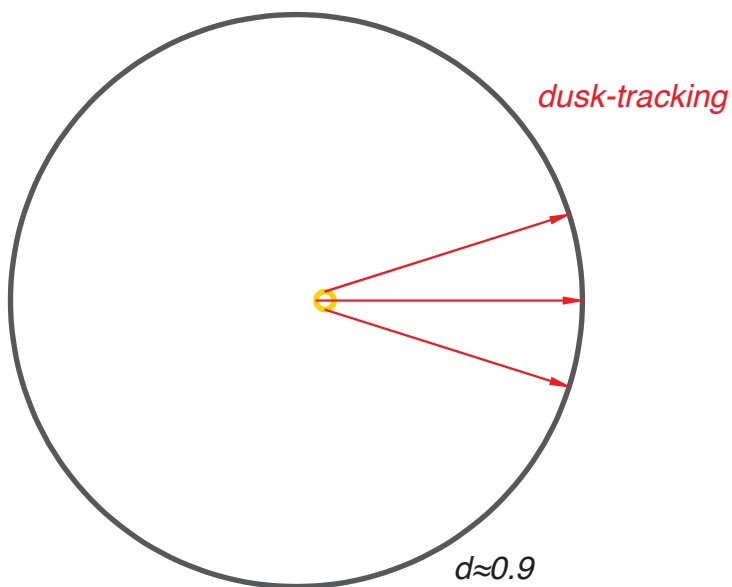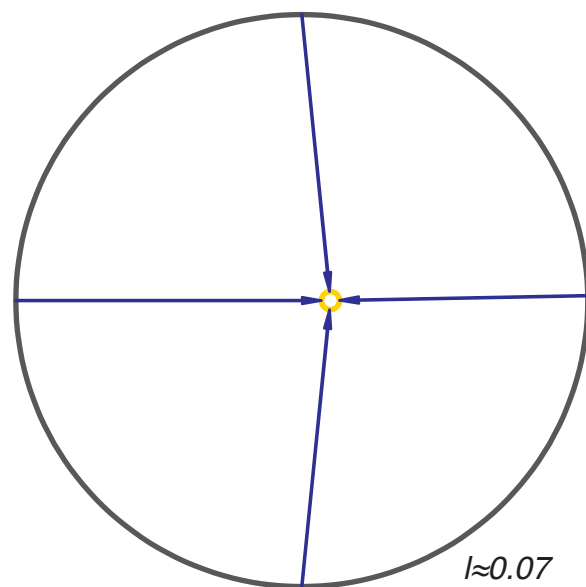

Supplement: supp [file elife-23539-supp-v1.zip]

**Figure 4—figure supplement 1.**

**A.**

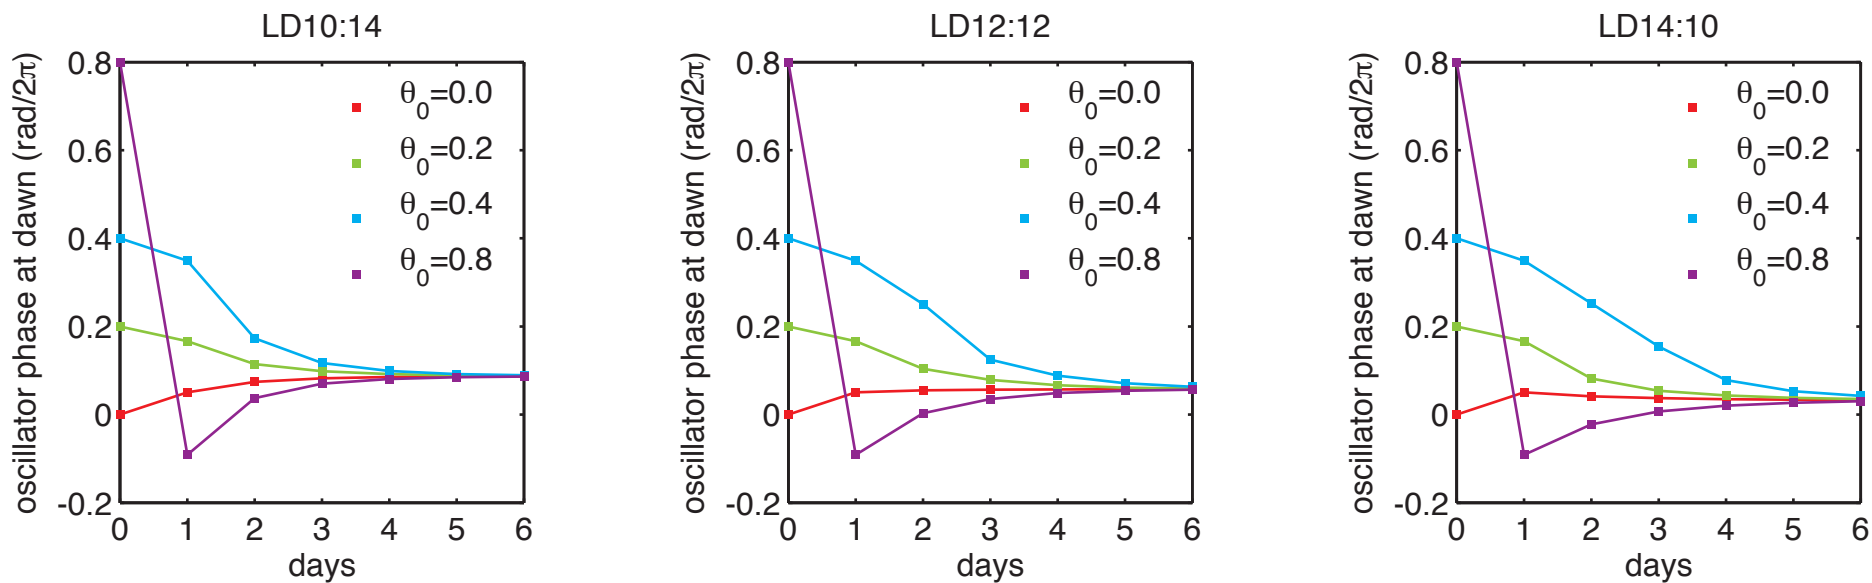

**B.**

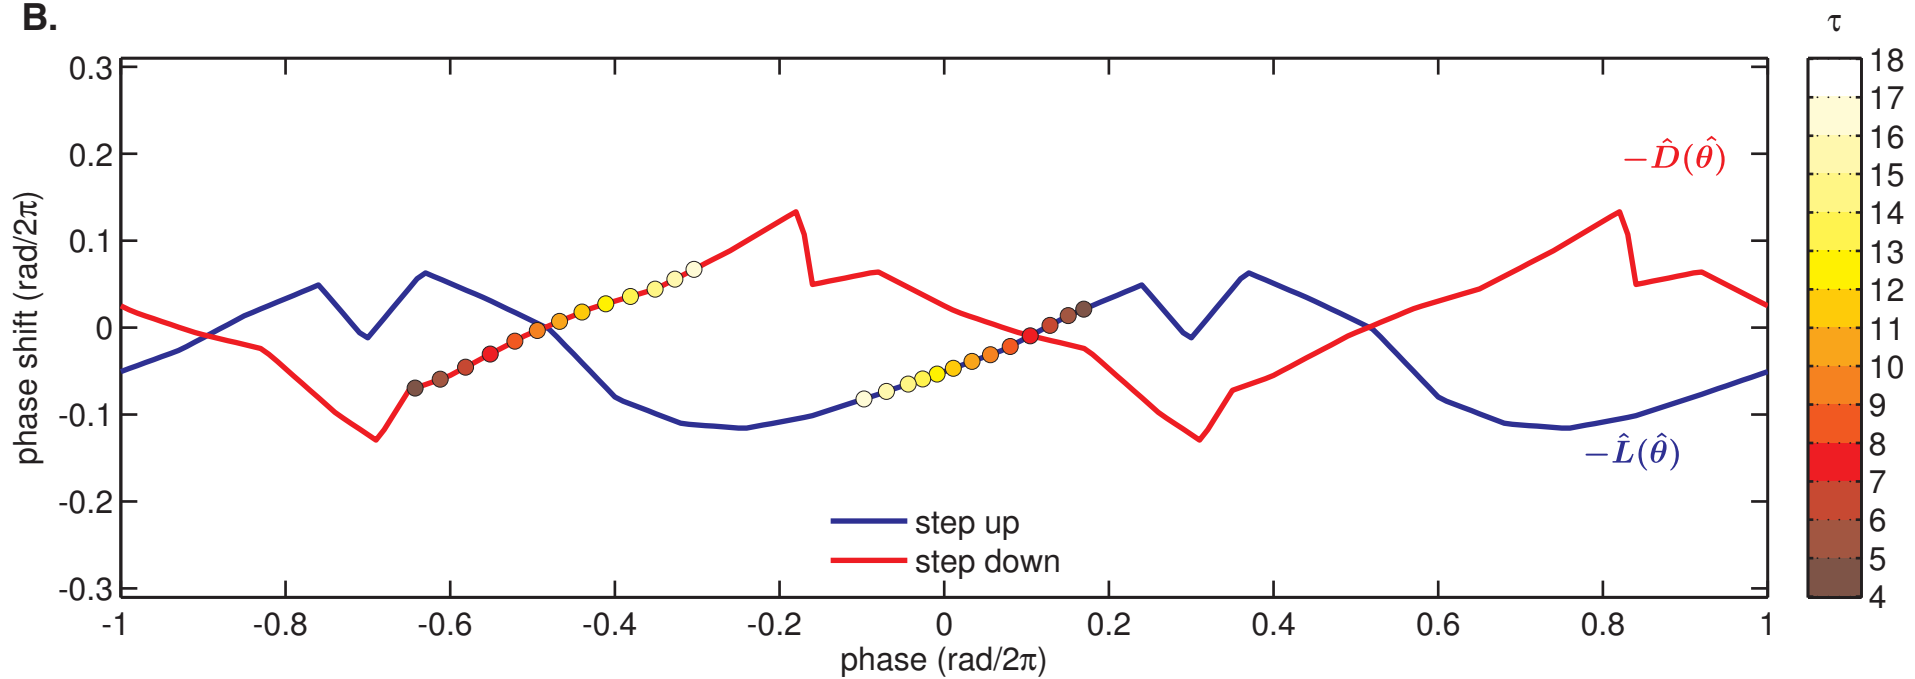

Supplement: supp [file elife-23539-supp-v1.zip]

**Figure 1—figure supplement 2.**

**A.**

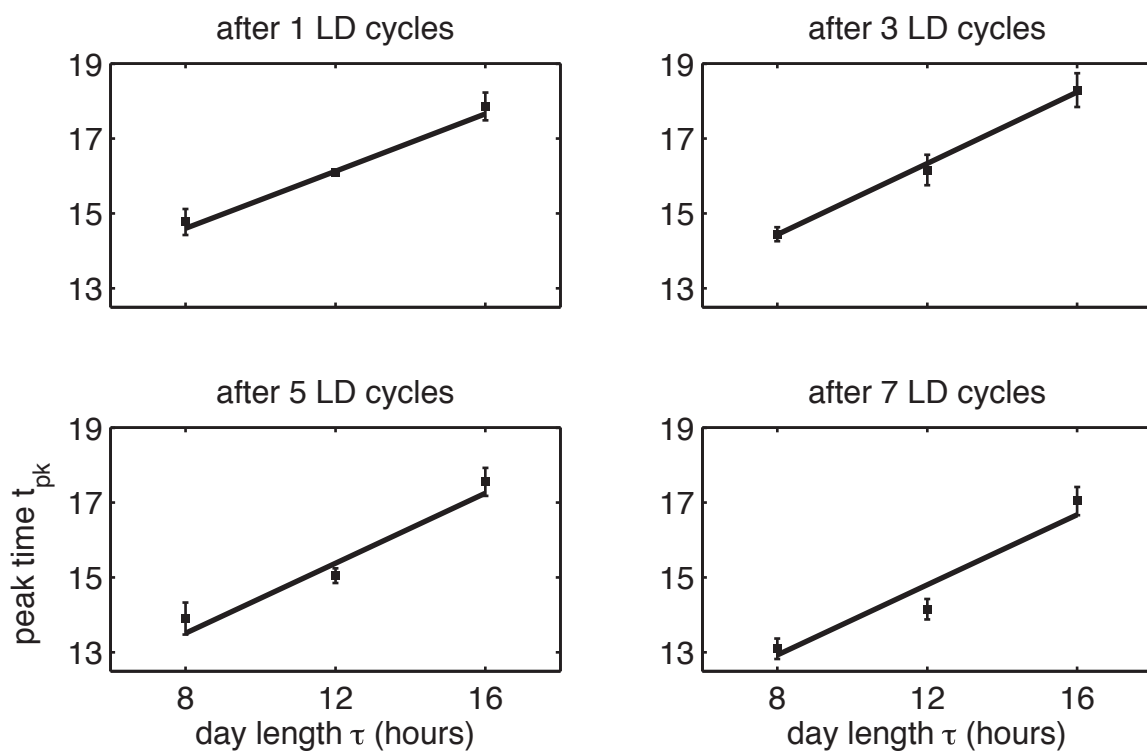

**B.**

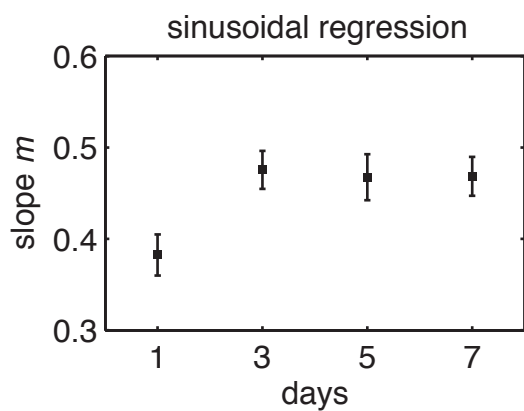

**C.**

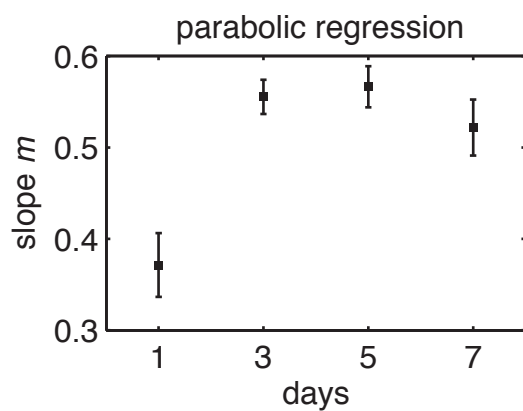

**D.**

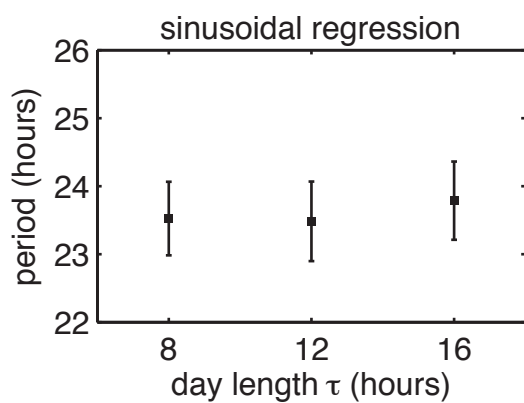

**E.**

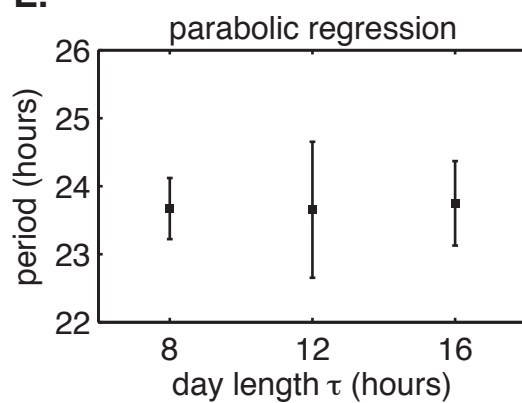

Supplement: supp [file elife-23539-supp-v1.zip]

**Figure 4—figure supplement 2.**

**A.**

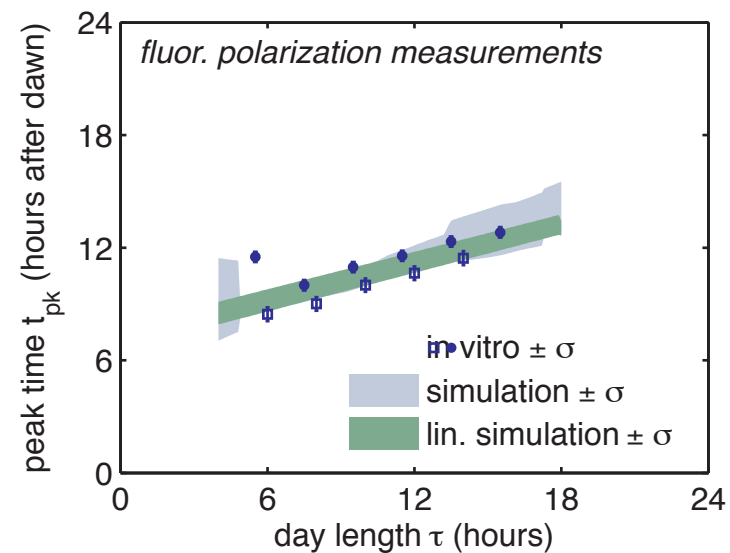

**B.**

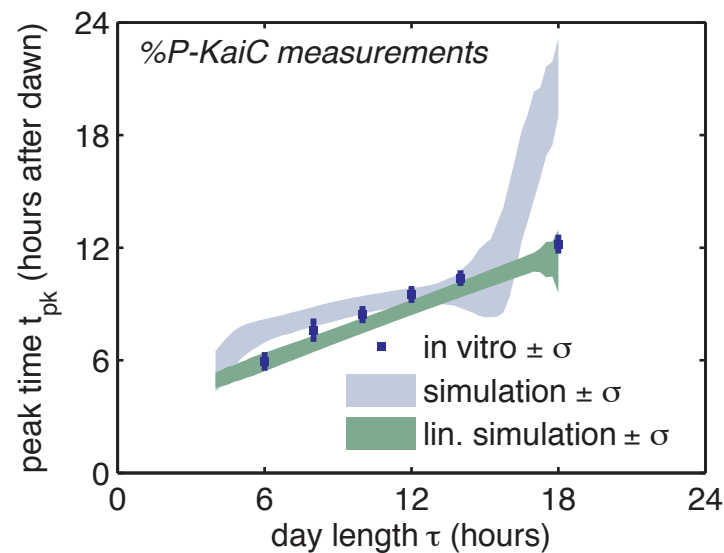

**C.**

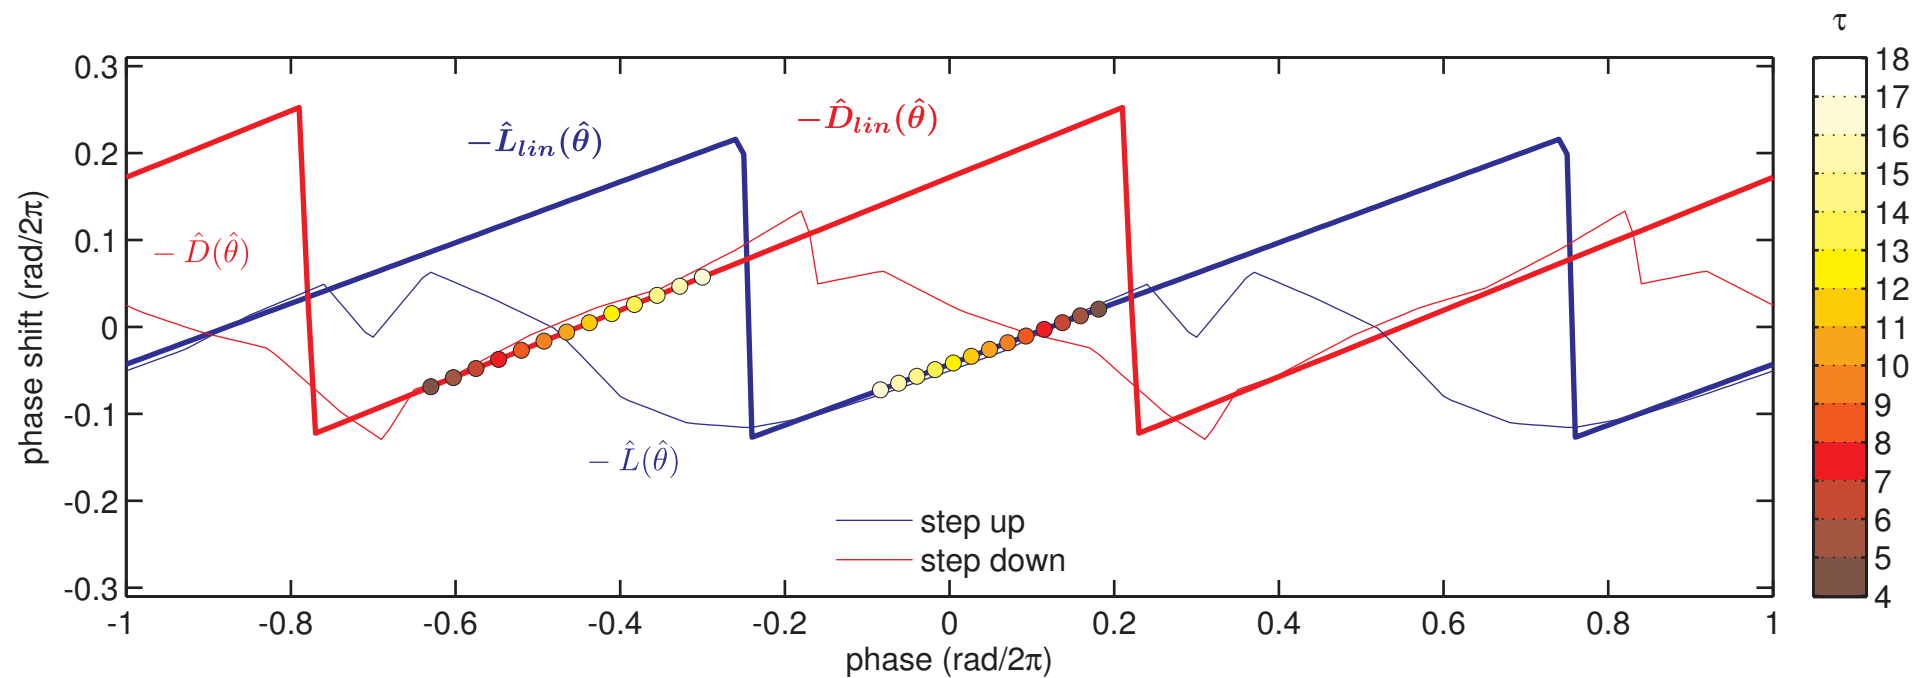

Supplement: supp [file elife-23539-supp-v1.zip]

Figure 1 — figure supplement 3.

A.

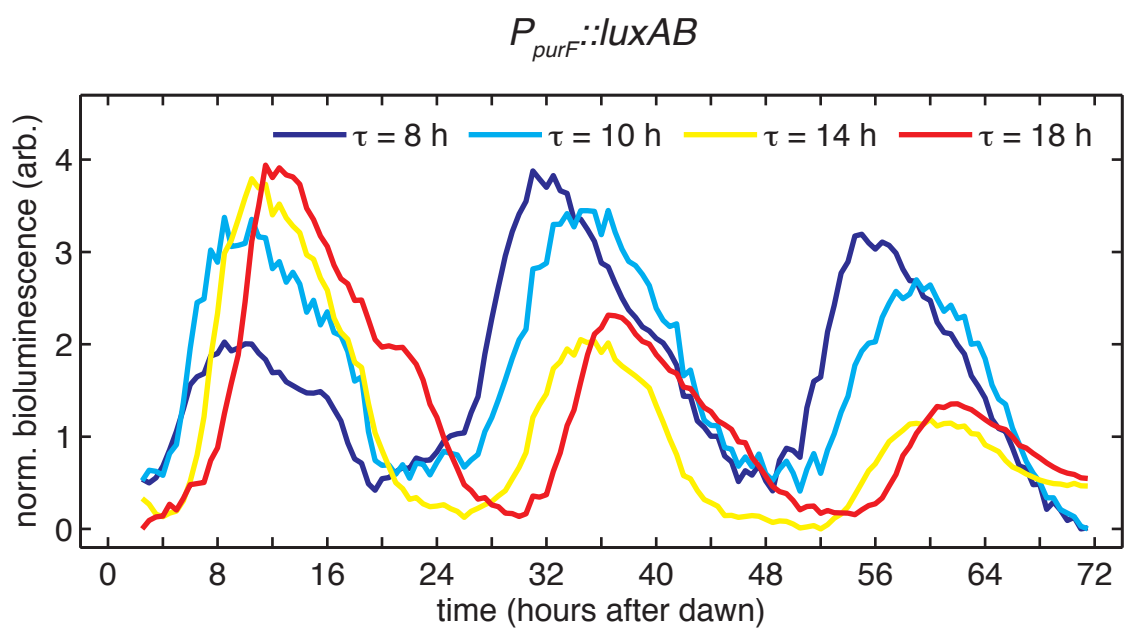

B.

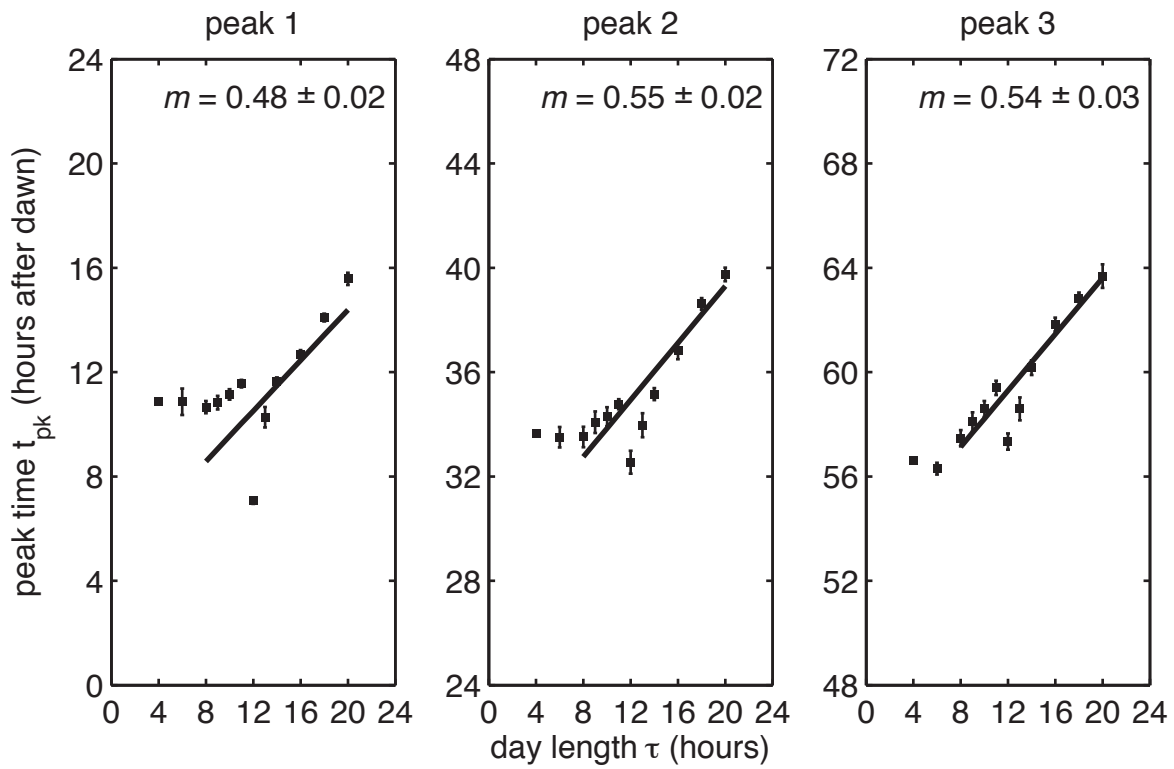

Supplement: supp [file elife-23539-supp-v1.zip]

Figure 5—figure supplement 1.

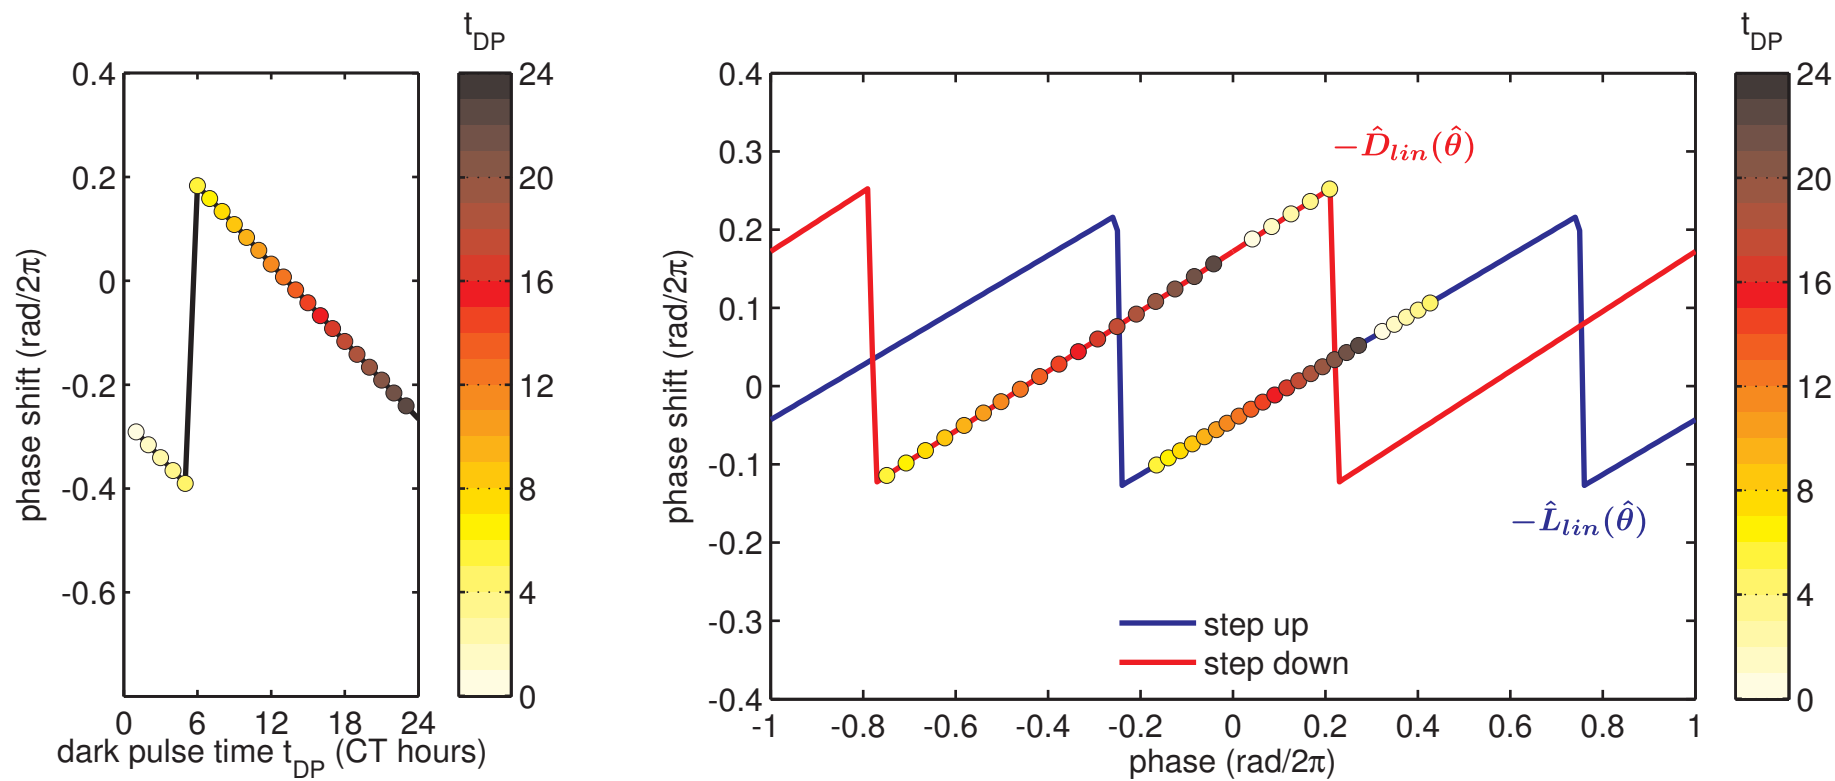

Supplement: supp [file elife-23539-supp-v1.zip]

**A.**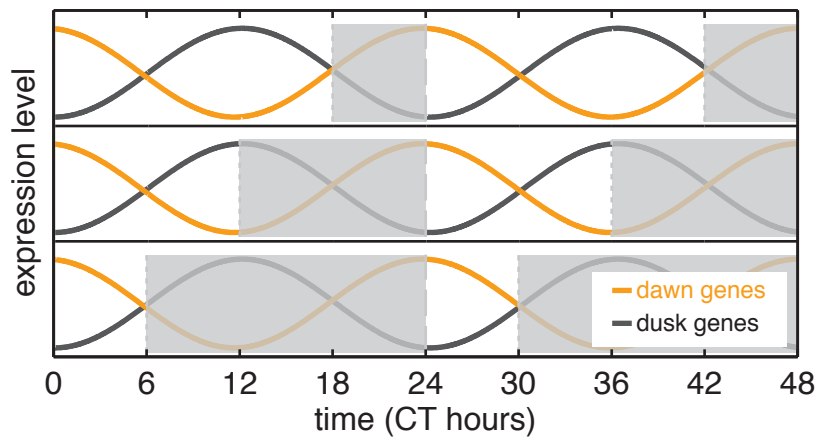

dawn-tracking  
 $m = 0$

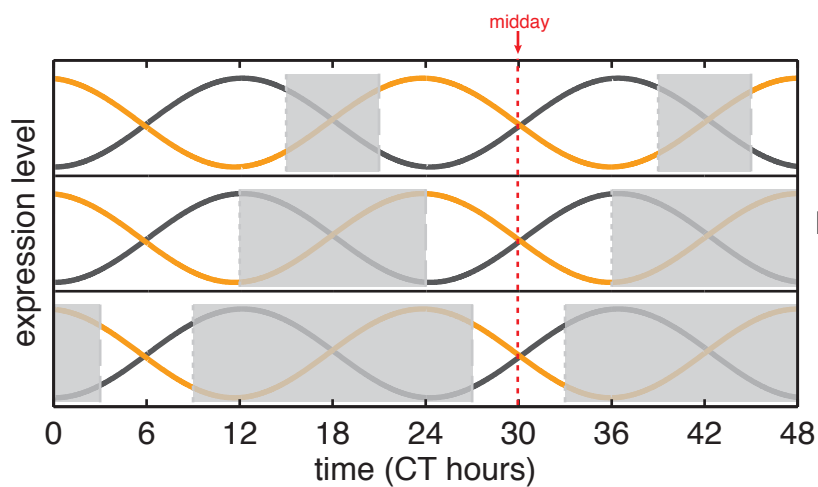

midday-tracking  
 $m = 0.5$

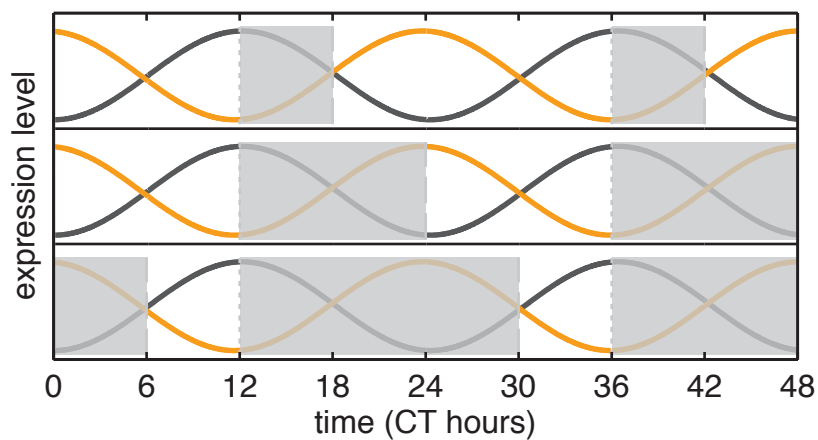

dusk-tracking  
 $m = 1$

**B.**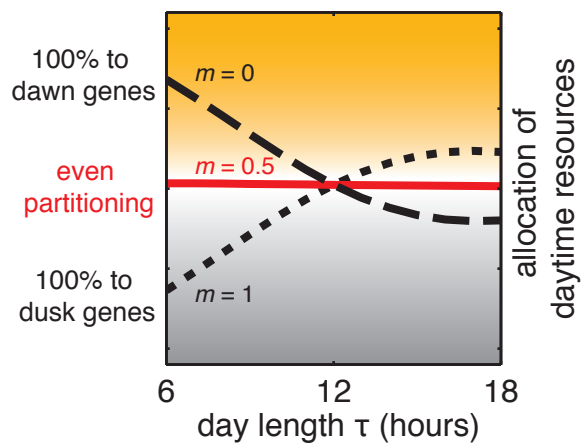

**Figure 6—figure supplement 3.**

Supplement: supp [file elife-23539-supp-v1.zip]

Figure 3—figure supplement 1.

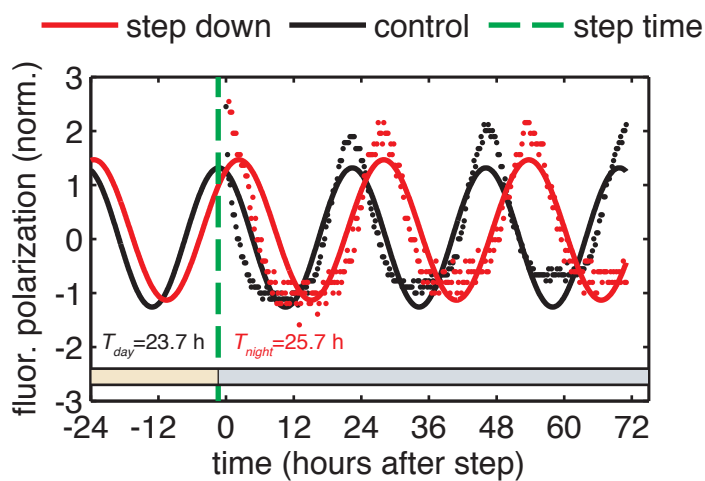

Supplement: supp [file elife-23539-supp-v1.zip]

Figure 2—figure supplement 1.

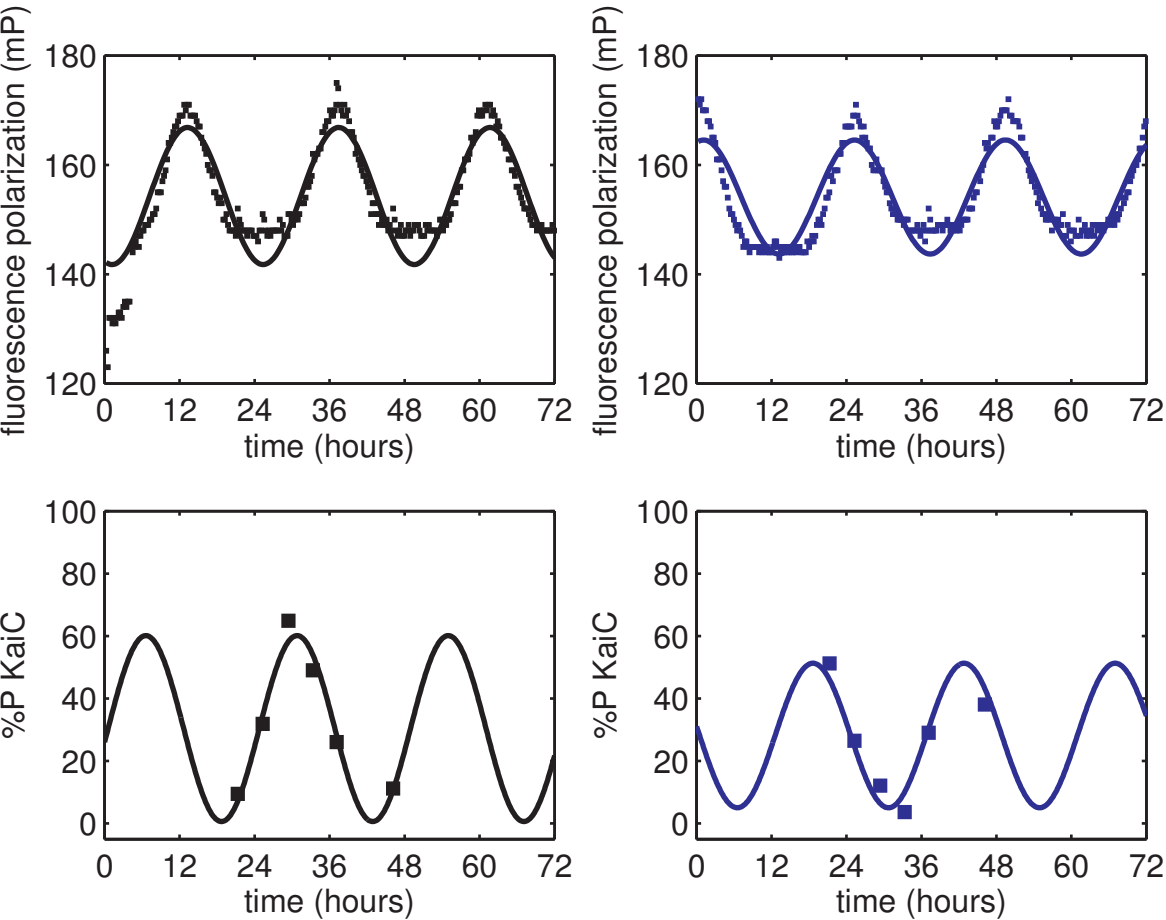

Supplement: supp [file elife-23539-supp-v1.zip]

Figure 1—figure supplement 1.

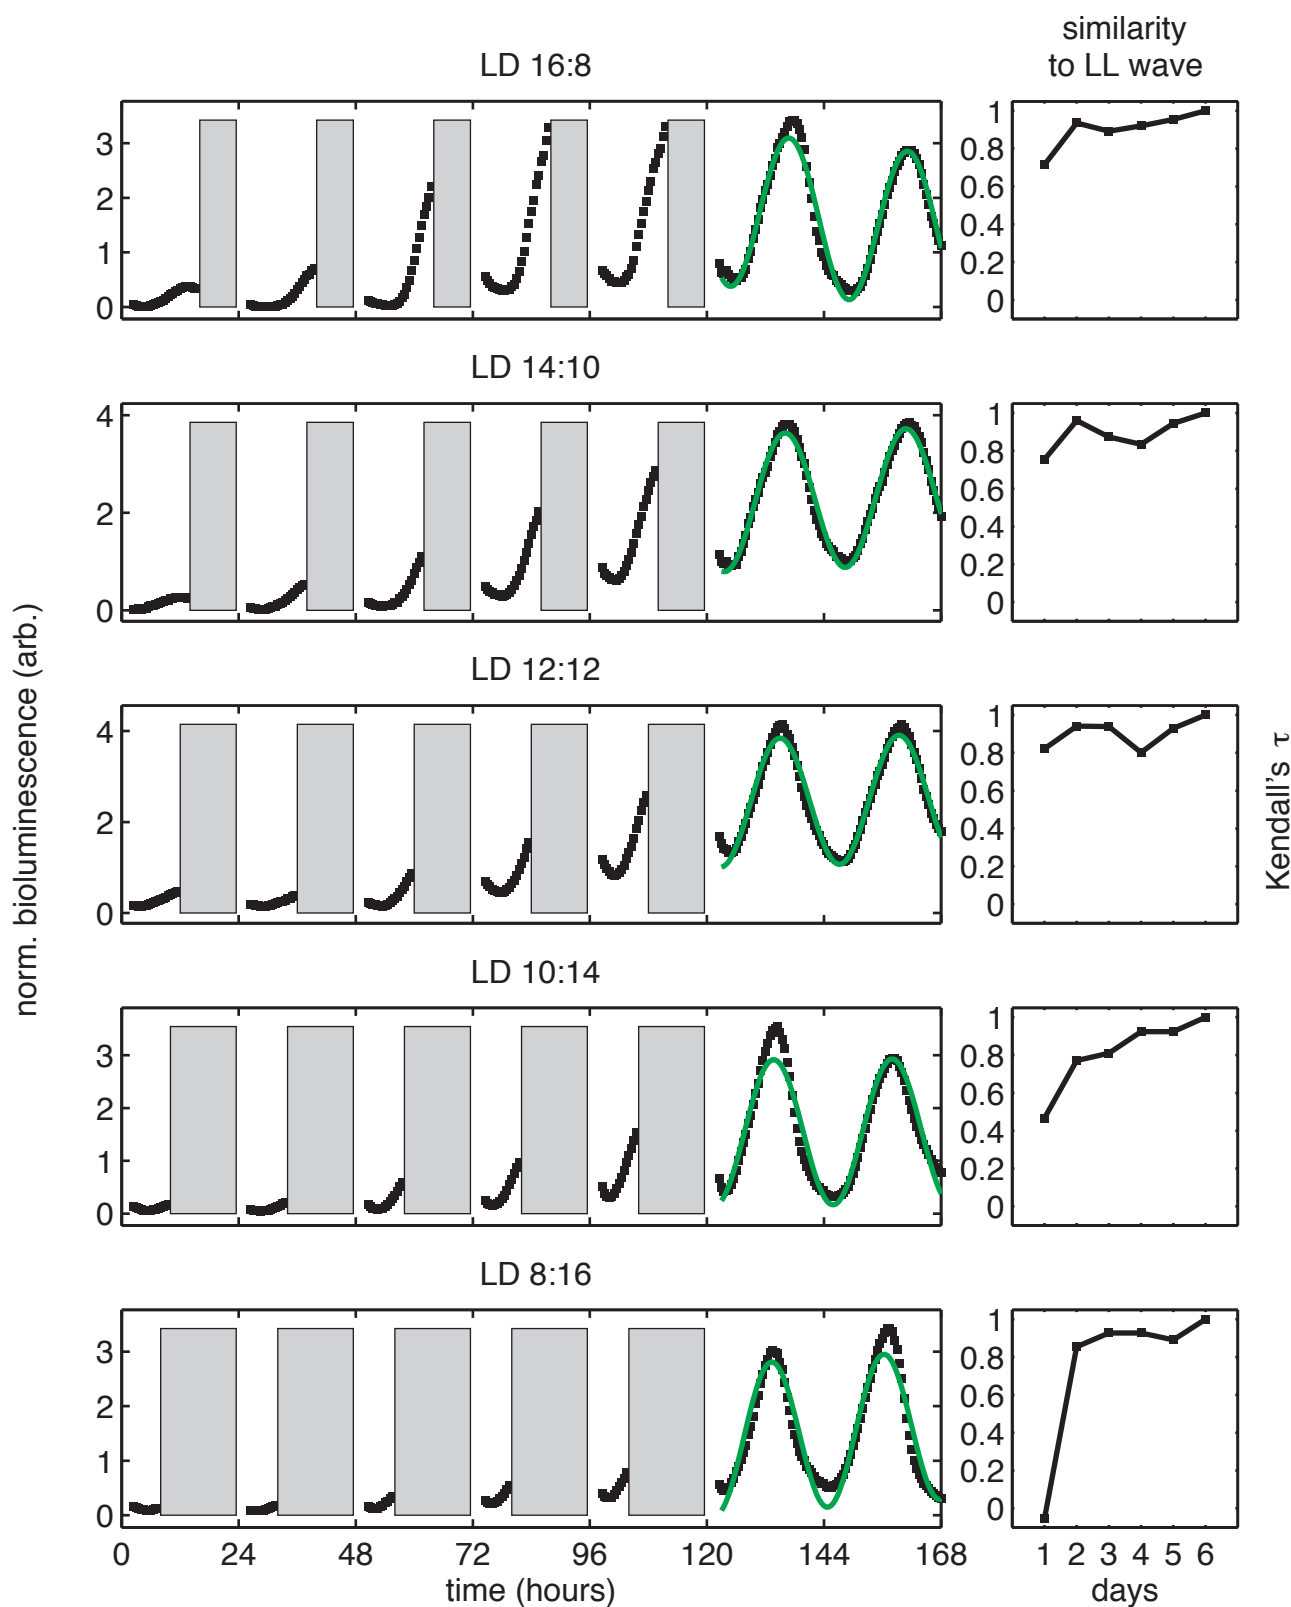

Supplement: supp [file elife-23539-supp-v1.zip]

Figure 4—figure supplement 3.

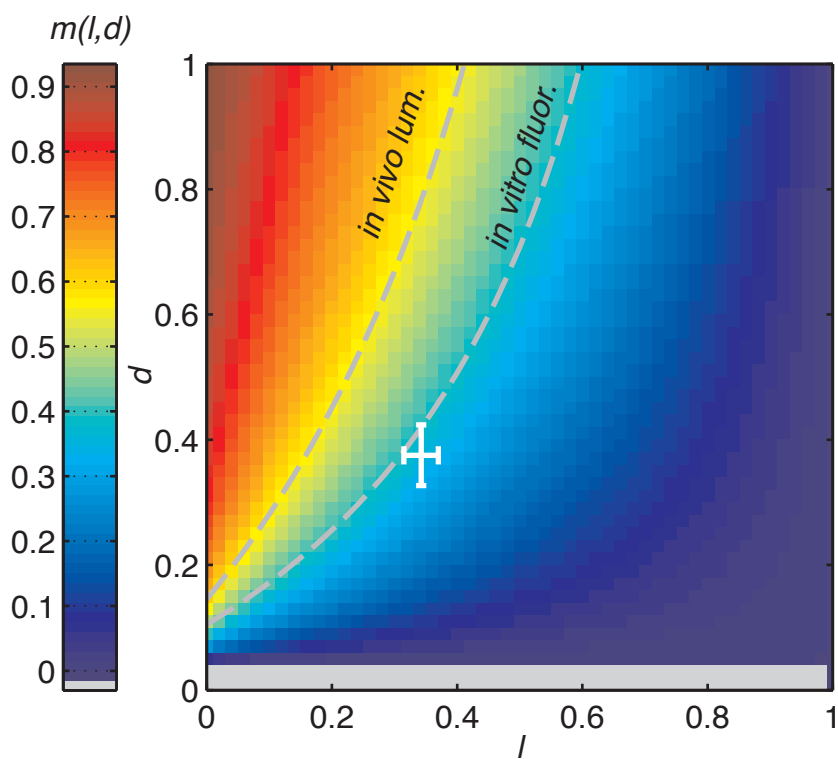

Supplement: supp [file elife-23539-supp-v1.zip]
